# Supplementary material
Source: PubMed Central journal article supplement (PMC4648562)
Supplement: NIHMS736792-supplement-supplement_1.pdf [file NIHMS736792-supplement-supplement_1.pdf]

## Supplementary Methods

### Analysis of single-cell real-time qPCR experiments using dynamic arrays in R statistical language

#### I. R Script for unsupervised hierarchical clustering of normal mammary cells

For the article: Lawson, D.A. *et al.*, Single-cell analysis reveals a stem cell program in human metastatic breast cancer cells.

```
#Load libraries
library(gplots)
library(reshape2)
library(plyr)

# Load data from each dynamic array (chip), and then extract tissue type information
# The qPCR data was exported from Fluidigm in the table results format
df1 = read.csv("File location", na.strings = c("999", ""), as.is=TRUE, skip=11)
df1 = df1[,c(1,2,5,7:13)]
names(df1) =
  c("position", "sample", "gene", "ct", "quality", "call", "ct.threshold", "Tm_in_range", "Tm.out.
  range", "Tm.peak.ratio")
df1$chip = "1"

df1$tissue = NA
df1$tissue[grep("B", df1$sample)] = "B"
df1$tissue[grep("L", df1$sample)] = "L"
df1$tissue[grep("LP", df1$sample)] = "LP"

#repeat above for all dynamic arrays, df2, df3, etc.

# combine all dynamic array runs
dfcomb = rbind(df1, df2, df3...)

# retain only genes that were run on all dynamic arrays
dfcomb = ddply(dfcomb,.(gene), transform, commongene =
  length(unique(chip))==length(unique(dfcomb$chip)))
dfcomb = dfcomb[dfcomb$commongene,]

# remove genes that are 100% failures
dfcomb = ddply(dfcomb,.(gene), transform, removegene = all(is.na(ct)))
dfcomb = dfcomb[!dfcomb$removegene,]

# replace failed ct with max ct observed for that gene (to assign a value approximating # a lower
limit of detection when a cell does not express a gene)
dfcomb = ddply(dfcomb,.(gene), transform, maxct = max(ct, na.rm=TRUE))
```

```

dfcomb$ct[is.na(dfcomb$ct)] = dfcomb$maxct[is.na(dfcomb$ct)] + 1

# Ct normalization: Subtract mean of basal/stem cells on a per-gene, per-array basis to correct for
# batch-to-batch differences
dfcomb = ddply(dfcomb,.(chip,gene),transform,ct.conB = ct -
  mean(ct[tissue=="B"],na.rm=TRUE))
dfcomb$log2exp.conB = -1* dfcomb$ct.conB

#Specify dataset to cluster
dfhcl = dfcomb

# some sample names are repeated across chips, so create a unique id # by pasting together
# sample and chip
dfhcl$id = paste(dfhcl$sample,dfhcl$chip)

# convert the data to a table that has samples as rows and genes as columns, and the log2
# expression value as the data in each cell of the table
expres = data.frame(dcast(dfhcl,id~gene,value.var = "log2exp.conB"),row.names=1)

# standardize (mean center and scale by standard deviation) the data across each gene
expres = t(scale(expres))

# get max/min 90% of data for the color lookup table that will be used to color the individual
# blocks of the heatmap. This prevents outliers from setting the color limits, which would
# otherwise compress most of the meaningful data to a few dim colors.
x = as.vector(expres)
z = (x-mean(x,na.rm=TRUE)) / sd(x,na.rm=TRUE)
rm.index = which(pnorm(abs(z), lower.tail=FALSE) < 0.05)
x[rm.index] = NA
maxvalue = max(x,na.rm=TRUE)
minvalue = min(x,na.rm=TRUE)

#OPTIONAL: set colors for sample tissue types
pheno =
  as.numeric(factor(dfhcl$tissue[match(colnames(expres),dfhcl$id)],levels=c("B","L",
  "LP"))))
phenocolors = c("blue","yellow","red")[pheno]

# need to define distance function due to the presence of missing data:
# Pearson correlation that will prevent missing values in the distance matrix.
# pairs of data rows that have no pairs of observations in which both vectors have non-missing
# values will have a distance assigned to them of 1.1 times the maximum distance observed for
# any pairs of rows in the matrix.
mydistfunPearson = function(x) {
  t.dist = 1 - cor(t(x), use="pairwise")
  t.limit = 1.1*max(t.dist,na.rm=TRUE)
}

```

```
t.dist[is.na(t.dist)] = t.limit
t.dist = as.dist(t.dist)
return(t.dist)
}

# use the heatmap.2 function from the gplots package. pdf("Filename.pdf",w=26,h=20)
heatmap.2(expres,distfun=mydistfunPearson,hclustfun=function(x)
  hclust(x,method="average"),breaks=seq(minvalue,maxvalue,length.out=76),col=bluered(
  75),na.color="grey",trace="none",ColSideColors=phenocolors,density.info="none",keysi
  ze=1.0,margins=c(2,7),cexRow=1,lmat=rbind(c(0,4),
  c(0,1),c(3,2),c(0,5)),lhei=c(0.90,0.30,5.05,1.00),lwid=c(1,11))
dev.off()
```

## II. R Script for clustering of tumor cells from PDX mice

For the article: Lawson, D.A. *et al.*, Single-cell analysis reveals a stem cell program in human metastatic breast cancer cells.

```
#Load libraries
library(gplots)
library(reshape2)
library(plyr)
library(dendextend)

# Load data from each dynamic array (chip), and then extract tissue type information
# The qPCR data was exported from Fluidigm in the table results format.
df1 = read.csv("File location", na.strings = c("999", ""), as.is=TRUE, skip=11)
df1 = df1[,c(1,2,5,7:13)]
names(df1) =
  c("position", "sample", "gene", "ct", "quality", "call", "ct.threshold", "Tm_in_range", "Tm.out.
    range", "Tm.peak.ratio")
df1$chip = "1"

df1$tissue = NA
df1$tissue[grep("T", df1$sample)] = "T"
df1$tissue[grep("LN", df1$sample)] = "LN"
df1$tissue[grep("LU", df1$sample)] = "LU"
df1$tissue[grep("BR", df1$sample)] = "BR"
df1$tissue[grep("BM", df1$sample)] = "BM"
df1$tissue[grep("BM", df1$sample)] = "PB"

# repeat above for all dynamic arrays, df2, df3, etc.

# combine all dynamic array runs
dfcomb = rbind(df1, df2, df3...)

# retain only genes that were run on all dynamic arrays
dfcomb = ddply(dfcomb,.(gene),transform,commongene =
  length(unique(chip))==length(unique(dfcomb$chip)))
dfcomb = dfcomb[dfcomb$commongene,]

# remove genes that are 100% failures
dfcomb = ddply(dfcomb,.(gene),transform,removegene = all(is.na(ct)))
dfcomb = dfcomb[!dfcomb$removegene,]

# some sample names are repeated across chips, so create a unique id # by pasting together
sample and chip
dfcomb$id = paste(dfcomb$sample, dfhcl$chip)
```

```

# remove cell samples expressing low levels of all genes (set at 80% failure here)
dfcomb = ddply(dfcomb,.(sample,chip),transform,removesample = sum(is.na(ct))/length(ct)>0.8)
if (sum(dfcomb$removesample)>0) dfcomb = dfcomb[!dfcomb$removesample,]

# OPTIONAL: retain genes with specific names (for focus on specific gene networks).
dfcomb = dfcomb[dfcomb$gene %in% c("GENE1","GENE2","GENE3",...),]

# Ct normalization: Subtract mean of primary tumor cells on a per-gene, per-array basis to
# correct for batch-to-batch differences
dfcomb = ddply(dfcomb,.(chip,gene),transform,ct.conT = ct -
  mean(ct[tissue=="T"],na.rm=TRUE))
dfcomb$log2exp.conT = -1* dfcomb$ct.conT

#Specify dataset to cluster
dfhcl = dfcomb

#OPTIONAL: Remove primary tumor, or other specific tissues from heatmap
dfhcl = dfhcl[!dfhcl$tissue %in% c("T"),]

# convert the data to a data frame that has samples as rows and genes as columns, and the tumor
# normalized log2 expression value as the data in each cell of the table
expres = data.frame(dcast(dfhcl,id~gene,value.var = "log2exp.conT"),row.names=1)

# standardize (mean center and scale by standard deviation) the data across each gene
expres = t(scale(expres))

# get max/min 90% of data for the color lookup table that will be used to color the individual
# blocks of the heatmap. This prevents outliers from setting the color limits, which would
# otherwise compress most of the meaningful data to a few dim colors.
x = as.vector(expres)
z = (x-mean(x,na.rm=TRUE)) / sd(x,na.rm=TRUE)
rm.index = which(pnorm(abs(z), lower.tail=FALSE) < 0.05)
x[rm.index] = NA
maxvalue = max(x,na.rm=TRUE)
minvalue = min(x,na.rm=TRUE)

#OPTIONAL: For supervised clustering based on tissue identity
dfhcltissueorder=NA
dfhcltissueorder[dfhcl$tissue=="BR"] = 1
dfhcltissueorder[dfhcl$tissue=="PB"] = 2
dfhcltissueorder[dfhcl$tissue=="BM"] =3
dfhcltissueorder[dfhcl$tissue=="LN"] = 4
dfhcltissueorder[dfhcl$tissue=="LU"] = 5
dfhcl = dfhcl[order(dfhcl$tissue),]

#OPTIONAL: set colors for sample tissue types

```

```
pheno =
  as.numeric(factor(dfhcl$tissue[match(colnames(expres),dfhcl$Id)],levels=c("T","LU",
    "LN","BR","PB","BM")))
phenocolors =
  c("yellow","mediumturquoise","mediumpurple1","seagreen3","deeppink4","blue")[phen
o]
```

```
#OPTIONAL: generate groups manually by ID (e.g., the metastatic cells, rank ordered by
# metastatic burden in the tissue they were found in. In the study, there were 14 metastatic
# tissues and therefore 14 groups )
```

```
dfhcl$group = "nogroup"
dfhcl$group[dfhcl$Id %in% c("LN1 1","LN2 1","LN3 1",...)] = "1"
dfhcl$group[dfhcl$Id %in% c("LN4 1","LN5 1","LN6 1",...)] = "2"
dfhcl$group[dfhcl$Id %in% c("LN7 1","LN8 1","LN9 1",...)] = "3"
```

```
#OPTIONAL: set colors for groups
```

```
pheno =
  as.numeric(factor(dfhcl$group[match(colnames(expres),dfhcl$Id)],levels=c("1",
    "2","3","nogroup")))
phenocolors = c("grey85","grey50","black","white")[pheno]
```

```
# For unsupervised clustering, need to define distance function due to the presence of missing
data:
```

```
# Pearson correlation that will prevent missing values in the distance matrix
# pairs of data rows that have no pairs of observations in which both vectors have non-missing
# values will have a distance assigned to them of 1.1 times the maximum distance observed for
# any pairs of rows in the matrix.
```

```
mydistfunPearson = function(x) {
  t.dist = 1 - cor(t(x), use="pairwise")
  t.limit = 1.1*max(t.dist,na.rm=TRUE)
  t.dist[is.na(t.dist)] = t.limit
  t.dist = as.dist(t.dist)
  return(t.dist)
}
```

```
# use the heatmap.2 function from the gplots package.
```

```
pdf("Filename.pdf",w=24,h=12)
heatmap.2(expres,distfun=mydistfunPearson,hclustfun=function(x)
  hclust(x,method="average"),breaks=seq(minvalue,maxvalue,length.out=76),col=bluered(
  75),na.color="grey",trace="none",ColSideColors=phenocolors,density.info="none",keysi
ze=1.0,margins=c(2,7),cexRow=1,lmat=rbind(c(0,4),
  c(0,1),c(3,2),c(0,5)),lhei=c(0.90,0.30,5.05,1.00),lwid=c(1,11))
dev.off()
```

```
# OPTIONAL: For supervised clustering of the samples:
```

```
pdf("Filename.pdf",w=24,h=12)
```

```
heatmap.2(expres,distfun=mydistfunPearson,hclustfun=function(x)
  hclust(x,method="average"),Colv=FALSE,breaks=seq(minvalue,maxvalue,length.out=76
),col=bluered(75),na.color="grey",trace="none",ColSideColors=phenocolors,density.info
="none",keysize=1.0,margins=c(2,7),cexRow=1,lmat=rbind(c(0,4),
  c(0,1),c(3,2),c(0,5)),lhei=c(1.25,0.35,5.70,0.60),lwid=c(1,11))
dev.off()
```

```
# OPTIONAL: For supervised clustering of the genes:
# i.e.To fix the gene order on the heatmap based on a previous unsupervised clustering run
# run this to get the order of the genes from the unsupervised clustering run
expres1=expres
thewts = rowMeans(expres1,na.rm=TRUE)
den = as.dendrogram(hclust(mydistfunPearson(expres1),method="average"))
den = reorder(den,wts=thewts)
geneorder = order.dendrogram(den)
geneorder = rev(geneorder)
```

```
# Then run this to do supervised clustering of the genes based on that previous run:
pdf("Filename.pdf",w=24,h=12)
heatmap.2(expres[geneorder,],distfun=mydistfunPearson,hclustfun=function(x)
  hclust(x,method="average"),Rowv=FALSE,dendrogram="column",breaks=seq(minvalue
,maxvalue,length.out=76),col=bluered(75),na.color="grey",trace="none",ColSideColors=
phenocolors,density.info="none",keysize=1.0,margins=c(2,7),cexRow=1,lmat=rbind(c(0,
4), c(0,1),c(3,2),c(0,5)),lhei=c(1.15,0.25,5.75,0.60),lwid=c(1,11))
dev.off()
```

```
# OPTIONAL: Re-order the dendrogram to optimize placement of group members next to each
# other:
den = as.dendrogram(hclust(mydistfunPearson(t(expres)),method="average"))
newden = reorder(den,pheno)
pdf("Filename.pdf",w=24,h=12)
heatmap.2(expres,distfun=mydistfunPearson,hclustfun=function(x)
  hclust(x,method="average"),Rowv=FALSE,dendrogram="column",Colv=newden,breaks
=seq(minvalue,maxvalue,length.out=76),col=bluered(75),na.color="grey",trace="none",
  ColSideColors=phenocolors,density.info="none",keysize=1.0,margins=c(2,7),cexRow=1,
  lmat=rbind(c(0,4), c(0,1),c(3,2),c(0,5)),lhei=c(1.15,0.35,5.65,0.60),lwid=c(1,11))
dev.off()
```

```
# OPTIONAL: to rotate branches on a dendrogram:
# chose the samples you want rotated. Inside c(...), put a comma-separated list of numbers that
# indicate the re-ordering of the tree by position (numbers). For the following example, the
# cluster containing samples 1-331 will be rotated. The remaining samples, from 332-889 will
# remain unrotated.
den = as.dendrogram(hclust(mydistfunPearson(t(expres)),method="average"))
newden = rotate(den,c(331:1,332:879))
pdf("Filename.pdf",w=24,h=12)
```

```
heatmap.2(expres[geneorder,],distfun=mydistfunPearson,hclustfun=function(x)
  hclust(x,method"average"),Rowv=FALSE,dendrogram="column",Colv=newden,breaks=
  seq(minvalue,maxvalue,length.out=76),col=bluered(75),na.color="grey",trace="none",Co
  lSideColors=phenocolors,density.info="none",keysize=1.0,margins=c(2,7),cexRow=1,lm
  at=rbind(c(0,4), c(0,1),c(3,2),c(0,5)),lhei=c(1.15,0.35,5.65,0.60),lwid=c(1,11))
dev.off()
```



### III. R Script for principal component analysis (PCA) of normal mammary cells

For the article: Lawson, D.A. *et al.*, Single-cell analysis reveals a stem cell program in human metastatic breast cancer cells.

```
#Load libraries
library(ggplot2)
library(plyr)
library(reshape2)
library(grid)

# Load data from each dynamic array (chip), and then extract tissue type information
# The qPCR data was exported from Fluidigm in the table results format.
df1 = read.csv("File location", na.strings = c("999", ""), as.is=TRUE, skip=11)
df1 = df1[,c(1,2,5,7:13)]
names(df1) =
  c("position", "sample", "gene", "ct", "quality", "call", "ct.threshold", "Tm_in_range", "Tm.out.
    range", "Tm.peak.ratio")

df1$tissue = NA
df1$tissue[grep("L", df1$sample)] = "L"
df1$tissue[grep("LP", df1$sample)] = "LP"
df1$tissue[grep("LU", df1$sample)] = "B"

#####
# PCA
#####

dfpca$log2exp = -1*dfpca$ct

# remove genes that have failed in all samples
dfpca = ddply(dfpca,.(gene),transform,keepgene = !all(is.na(log2exp)))
dfpca = dfpca[dfpca$keepgene,]

# remove cell samples expressing low levels of all genes (set at 80% failure here)
dfpca = ddply(dfpca,.(sample),transform,remove = sum(is.na(log2exp))/length(log2exp)>0.8)
if (sum(dfpca$remove)>0) dfpca = dfpca[-which(dfpca$remove),]

# convert NA to the lowest expression value minus 1, on a per-gene basis, so all missing values
# are tied at the same very low value, with each value different for a different gene
dfpca = ddply(dfpca,.(gene),transform,min = min(log2exp,na.rm=TRUE)-1)
dfpca$log2exp[is.na(dfpca$log2exp)] = dfpca$min[is.na(dfpca$log2exp)]

# make a data.frame with samples as rows and genes as columns and log2 expression as value
df = data.frame(dcast(dfpca,sample~gene,value.var =
  "log2exp"),row.names=1,check.names=FALSE)
```

```
# compute PCA using singular value decomposition (SVD)
pcdat = prcomp(x=df,scale.=TRUE)

# get first two principal components and relevant phenotype data into data frame
pc =
  data.frame(pcdat$x[,1:2],tissue=dfpca$tissue[match(rownames(pcdat$x),dfpca$sample)],
            sample=rownames(pcdat$x))

# get loadings and retain genes with high loadings
loadings = data.frame(pcdat$rotation[,1:2])
loadings = loadings[apply(loadings, 1, function(x) max(abs(x))) > .0124,]

# amplify loadings so they can be visualized on the plot
loadings = loadings * 20
loadings$gene = rownames(loadings)

# OPTIONAL: choose loadings to visualize on the plot
loadings = loadings[loadings$gene %in% c("GENE1", "GENE2", "GENE3",...)]

# OPTIONAL: choose tissue colors and shapes
pc$tissue = factor(pc$tissue,levels=c("B", "LP", "L"))
mycolors = c("blue", "red", "yellow")
myshapes = c(16,15,17)

myTheme = theme(
  text = element_text(size=14,colour="black"),
  panel.background = element_blank(),
  panel.grid.major = element_blank(),
  panel.grid.minor = element_blank(),
  axis.text=element_text(colour="black",size=16),
  axis.title.x=element_text(colour="black",size=18),
  axis.title.y=element_text(colour="black",size=18,angle=90),
  axis.line = element_line(size=1,colour="black"),
  axis.ticks = element_line(size=1,colour="black"),
  panel.border = element_blank(),
  legend.background = element_blank(),
  legend.key = element_blank(),
  legend.title = element_text(colour="black",size=12),
  legend.text = element_text(colour="black",size=12)
)

# create plot
p = ggplot(data=pc, aes(PC1, PC2)) + geom_point(aes(colour=tissue, shape=tissue),size=3.5)
p = p + scale_colour_manual(values=mycolors) + scale_size_manual(values=c(2,5,5)) +
  scale_shape_manual(values=myshapes)
```

```
p = p + geom_segment(data=loadings, aes(x=0, y=0, xend=PC1, yend=PC2),
  arrow=arrow(length=unit(0.2,"cm")), alpha=1.0)
p = p + geom_text(data=data.frame(PC1=sapply(loadings$PC1,function(x) ifelse(x>0,x+0.1,x-
  0.1)),PC2=sapply(loadings$PC2,function(x) ifelse(x>0,x+0.1,x-
  0.1)),gene=loadings$gene), aes(x=PC1, y=PC2, label=gene), alpha=1,
  size=5,face="bold")
p = p + geom_text(aes(label=sample))
print(p + myTheme)

pdf("Filename")
print(p + myTheme)
dev.off()
```

#### IV. R Script for principal component analysis (PCA) of tumor cells from individual PDX mice

For the article: Lawson, D.A. *et al.*, Single-cell analysis reveals a stem cell program in human metastatic breast cancer cells.

```
#Load libraries
library(ggplot2)
library(plyr)
library(reshape2)
library(grid)

# Load data from each dynamic array (chip), and then extract tissue type information
# The qPCR data was exported from Fluidigm in the table results format.
df1 = read.csv("File location", na.strings = c("999", ""), as.is=TRUE, skip=11)
df1 = df1[,c(1,2,5,7:13)]
names(df1) =
  c("position", "sample", "gene", "ct", "quality", "call", "ct.threshold", "Tm_in_range", "Tm.out.
  range", "Tm.peak.ratio")

df1$tissue = NA
df1$tissue[grep("T", df1$sample)] = "T"
df1$tissue[grep("LN", df1$sample)] = "LN"
df1$tissue[grep("LU", df1$sample)] = "LU"
df1$tissue[grep("BR", df1$sample)] = "BR"
df1$tissue[grep("BM", df1$sample)] = "BM"
df1$tissue[grep("BM", df1$sample)] = "PB"

#####
# PCA
#####

dfpca$log2exp = -1*dfpca$ct

# remove genes that have failed in all samples
dfpca = ddply(dfpca,.(gene),transform,keepgene = !all(is.na(log2exp)))
dfpca = dfpca[dfpca$keepgene,]

# remove cell samples expressing low levels of all genes (set at 80% failure here)
dfpca = ddply(dfpca,.(sample),transform,remove = sum(is.na(log2exp))/length(log2exp)>0.8)
if (sum(dfpca$remove)>0) dfpca = dfpca[-which(dfpca$remove),]

# convert NA to the lowest expression value minus 1, on a per-gene basis, so all missing values
# are tied at the same very low value, with each value different for a different gene
dfpca = ddply(dfpca,.(gene),transform,min = min(log2exp,na.rm=TRUE)-1)
```

```
dfpca$log2exp[is.na(dfpca$log2exp)] = dfpca$min[is.na(dfpca$log2exp)]

# make a data.frame with samples as rows and genes as columns and log2 expression as value
df = data.frame(dcast(dfpca,sample~gene,value.var =
  "log2exp"),row.names=1,check.names=FALSE)

# compute PCA using singular value decomposition (SVD)
pcdat = prcomp(x=df,scale.=TRUE)

# get first two principal components and relevant phenotype data into data frame
pc =
  data.frame(pcdat$x[,1:2],tissue=dfpca$tissue[match(rownames(pcdat$x),dfpca$sample)],
    sample=rownames(pcdat$x))

# get loadings and retain genes with high loadings
loadings = data.frame(pcdat$rotation[,1:2])
loadings = loadings[apply(loadings, 1, function(x) max(abs(x))) > .0124,]

# amplify loadings so they can be visualized on the plot
loadings = loadings * 20
loadings$gene = rownames(loadings)

# OPTIONAL: choose loadings to visualize on the plot
loadings = loadings[loadings$gene %in% c("GENE1", "GENE2", "GENE3",...)]

# OPTIONAL: choose tissue colors and shapes
pc$tissue = factor(pc$tissue,levels=c("LN", "LU", "T"))
mycolors = c("red", "blue", "black")
myshapes = c(17,16,18)

myTheme = theme(
  text = element_text(size=14,colour="black"),
  panel.background = element_blank(),
  panel.grid.major = element_blank(),
  panel.grid.minor = element_blank(),
  axis.text=element_text(colour="black",size=16),
  axis.title.x=element_text(colour="black",size=18),
  axis.title.y=element_text(colour="black",size=18,angle=90),
  axis.line = element_line(size=1,colour="black"),
  axis.ticks = element_line(size=1,colour="black"),
  panel.border = element_blank(),
  legend.background = element_blank(),
  legend.key = element_blank(),
  legend.title = element_text(colour="black",size=12),
  legend.text = element_text(colour="black",size=12)
)
```

```
# plot generation
p = ggplot(data=pc, aes(PC1, PC2)) + geom_point(aes(colour=tissue, shape=tissue),size=3.5)
p = p + scale_colour_manual(values=mycolors) + scale_size_manual(values=c(2,5,5)) +
  scale_shape_manual(values=myshapes)
p = p + geom_segment(data=loadings, aes(x=0, y=0, xend=PC1, yend=PC2),
  arrow=arrow(length=unit(0.2,"cm")), alpha=1.0)
p = p + geom_text(data=data.frame(PC1=sapply(loadings$PC1,function(x) ifelse(x>0,x+0.1,x-
  0.1)),PC2=sapply(loadings$PC2,function(x) ifelse(x>0,x+0.1,x-
  0.1)),gene=loadings$gene), aes(x=PC1, y=PC2, label=gene), alpha=1,
  size=5,face="bold")
p = p + geom_text(aes(label=sample))
print(p + myTheme)

pdf("Filename")
print(p + myTheme)
dev.off()
```

## V. R Script for generation of box plots to display gene expression in normal mammary cells

For the article: Lawson, D.A. *et al.*, Single-cell analysis reveals a stem cell program in human metastatic breast cancer cells.

```
#Load libraries
library(ggplot2)
library(plyr)
library(reshape2)

# Load data from each dynamic array (chip), and then extract tissue type information
# The qPCR data was exported from Fluidigm in the table results format
df1 = read.csv("File location", na.strings = c("999", ""), as.is=TRUE, skip=11)
df1 = df1[,c(1,2,5,7:13)]
names(df1) =
  c("position", "sample", "gene", "ct", "quality", "call", "ct.threshold", "Tm_in_range", "Tm.out.
  range", "Tm.peak.ratio")
df1$chip = "1"

df1$tissue = NA
df1$tissue[grepl("L", df1$sample)] = "L"
df1$tissue[grepl("LP", df1$sample)] = "LP"
df1$tissue[grepl("LU", df1$sample)] = "B"

# repeat above for all dynamic arrays, df2, df3, etc.

# combine all dynamic array runs
dfcomb = rbind(df1, df2, df3...)

# remove genes that are 100% failures
dfcomb = ddply(dfcomb,.(gene), transform, removegene = all(is.na(ct)))
dfcomb = dfcomb[!dfcomb$removegene,]

# some sample names replicated across chips, but samples are not the same, so create a unique id
# by pasting together sample and chip
dfcomb$id = paste(dfcomb$sample, dfcomb$chip)

# remove cell samples expressing low levels of all genes (set at 80% failure here)
dfcomb = ddply(dfcomb,.(id), transform, removesample = sum(is.na(ct))/length(ct)>0.8)
if (sum(dfcomb$removesample)>0) dfcomb = dfcomb[!dfcomb$removesample,]

# Ct normalization: Subtract mean of basal/stem cells on a per-gene, per-array basis to correct for
# batch-to-batch differences
dfcomb = ddply(dfcomb,.(chip, gene), transform, ct.conB = ct -
  mean(ct[tissue=="B"], na.rm=TRUE))
dfcomb$log2exp.conB = -1 * dfcomb$ct.conB
```

```
# choose order of tissue types on plots
dfcomb$tissue = factor(dfcomb$tissue,levels=c("B","LP","L"))

#####
# MAKE PLOTS
#####
myTheme = theme(
  text = element_text(size=14,colour="black"),
  panel.background = element_blank(),
  panel.grid.major = element_blank(),
  panel.grid.minor = element_blank(),
  axis.text=element_text(colour="black",size=18),
  axis.title.x=element_text(colour="black",size=18),
  axis.title.y=element_text(colour="black",size=18,angle=90),
  axis.line = element_line(size=1,colour="black"),
  axis.ticks = element_line(size=1,colour="black"),
  panel.border = element_blank(),
  legend.background = element_blank(),
  legend.key = element_blank(),
  legend.title = element_text(colour="black",size=12),
  legend.text = element_text(colour="black",size=12),
  strip.text = element_text(colour="black",size=18),
  strip.background = element_rect(fill=NA)
)

# choose which data frame to plot (dfcomb)
dfbox = dfcomb

# display the data so that the failed points are plotted on a separate layer and vertically jittered
dfbox.stats = dfbox

# make a separate data frame just for the missing data in which NAs are converted to the lowest
# expression value minus 2, on a per-gene basis, so all missing values are tied at the same very
# low value, with each value different for a different gene
dfbox$failed = is.na(dfbox$log2exp.conB)
dfbox = ddply(dfbox,.(gene),transform,min = min(log2exp.conB,na.rm=TRUE)-2)
dfbox$log2exp.conB[dfbox$failed] = dfbox$min[dfbox$failed]
dfbox.failed = dfbox[dfbox$failed,]
dfbox$log2exp.conB[dfbox$failed] = NA

# plot B, LP, and L
pdf("Filename.pdf",w=30,h=30)
ggplot(dfbox,aes(tissue,log2exp.conB)) +
  geom_boxplot(data=dfbox.stats,outlier.size=NA,fill=NA) +
  geom_point(position=position_jitter(w=0.2,h=0),colour="black") +
```



```
geom_point(data=dfbox.failed,position=position_jitter(w=0.2,h=0.5),colour="red") +  
facet_wrap(~gene,scales="free") + ylab("log2 relative expression, normalized by  
basal/stem cells on a per-gene basis") + myTheme  
dev.off()
```

## VI. R Script for generation of box plots to display gene expression in tumor cell populations

For the article: Lawson, D.A. *et al.*, Single-cell analysis reveals a stem cell program in human metastatic breast cancer cells.

# In this study, there were several types of box plots generated:

1. Expression in metastatic tissues: Lung, lymph node, brain, peripheral blood, and bone marrow
2. Expression by metastatic burden: Low-burden, intermediate-burden, high-burden, and primary tumor cells
3. Expression in lung mets from different PDX models: HCI-001, HCI-002, HCI-010

```
#Load libraries
library(ggplot2)
library(plyr)
library(reshape2)
```

```
# Load data from each dynamic array (chip), and then extract tissue type information
# The qPCR data was exported from Fluidigm in the table results format
df1 = read.csv("File location", na.strings = c("999",""),as.is=TRUE,skip=11)
df1 = df1[,c(1,2,5,7:13)]
names(df1) =
  c("position","sample","gene","ct","quality","call","ct.threshold","Tm_in_range","Tm.out.
  range","Tm.peak.ratio")
df1$chip = "1"
```

```
df1$tissue = NA
df1$tissue[grep("T",df1$sample)] = "T"
df1$tissue[grep("LN",df1$sample)] = "LN"
df1$tissue[grep("LU",df1$sample)] = "LU"
df1$tissue[grep("BR",df1$sample)] = "BR"
df1$tissue[grep("BM",df1$sample)] = "BM"
df1$tissue[grep("BM",df1$sample)] = "PB"
```

# repeat above for all dynamic arrays, df2, df3, etc.

```
# combine all dynamic array runs
dfcomb = rbind(df1, df2, df3...)
```

```
# remove genes that are 100% failures
dfcomb = ddply(dfcomb,.(gene),transform,removegene = all(is.na(ct)))
dfcomb = dfcomb[!dfcomb$removegene,]
```

```
# some sample names replicated across chips, but samples are not the same, so create a unique id
# by pasting together sample and chip
dfcomb$id = paste(dfcomb$sample,dfcomb$chip)
```

```

# remove cell samples expressing low levels of all genes (set at 80% failure here)
dfcomb = ddply(dfcomb,.(id),transform,removesample = sum(is.na(ct))/length(ct)>0.8)
if (sum(dfcomb$removesample)>0) dfcomb = dfcomb[!dfcomb$removesample,]

# OPTIONAL: Remove samples that are not of interest (e.g., for PDX model comparison, only
# lung mets were examined and other mets were excluded)
dfcomb = dfcomb[!dfcomb$tissue %in% c("BR","LN","PB","BM"),]

# Ct normalization: Subtract mean of tumor cells on a per-gene, per-array basis to correct for
# batch-to-batch differences
dfcomb = ddply(dfcomb,(chip,gene),transform,ct.conT = ct -
  mean(ct[tissue=="T"],na.rm=TRUE))
dfcomb$log2exp.conT = -1* dfcomb$ct.conT

# OPTIONAL: generate groups to manually designate colors by ID (specific cells)
# For grouping based on PDX model: (Note: In the study, this was only done on lung mets)
dfcomb$group = "nogroup"
dfcomb$group[dfcomb$id %in% c("LU1 1","LU2 1","LU3 1",...)] = "HCI-001"
dfcomb$group[dfcomb$id %in% c("LU4 1","LU5 1","LU6 1",...)] = "HCI-002"
dfcomb$group[dfcomb$id %in% c("LU7 1","LU8 1","LU9 1",...)] = "HCI-010"
dfcomb = dfcomb[dfcomb$group!="nogroup",]

# choose order of groups on plots
dfcomb$group = factor(dfcomb$group,levels=c("001","002","010"))

# OPTIONAL: generate groups to manually designate colors by ID (specific cells)
# For grouping based on low, intermediate, and high burden, and tumor:
dfcomb$group = "nogroup"
dfcomb$group[dfcomb$id %in% c("LN1 1","LN2 1","LN3 1",...)] = "low"
dfcomb$group[dfcomb$id %in% c("LN4 1","LN5 1","LN6 1",...)] = "intermediate"
dfcomb$group[dfcomb$id %in% c("LN7 1","LN8 1","LN9 1",...)] = "high"
dfcomb$group[dfcomb$tissue=="T"] = "T"
dfcomb = dfcomb[dfcomb$group!="nogroup",]

# OPTIONAL: choose order of groups on plots
dfcomb$group = factor(dfcomb$group,levels=c("T","early","mid","late"))

#####
# MAKE PLOTS
#####
myTheme = theme(
  text = element_text(size=14,colour="black"),
  panel.background = element_blank(),

```

```
panel.grid.major = element_blank(),
panel.grid.minor = element_blank(),
axis.text=element_text(colour="black",size=18),
axis.title.x=element_text(colour="black",size=18),
axis.title.y=element_text(colour="black",size=18,angle=90),
axis.line = element_line(size=1,colour="black"),
axis.ticks = element_line(size=1,colour="black"),
panel.border = element_blank(),
legend.background = element_blank(),
legend.key = element_blank(),
legend.title = element_text(colour="black",size=12),
legend.text = element_text(colour="black",size=12),
strip.text = element_text(colour="black",size=18),
strip.background = element_rect(fill=NA)
)

# choose which data frame to plot (dfcomb)
dfbox = dfcomb

# display the data so that the failed points are plotted on a separate layer and vertically jittered
dfbox.stats = dfbox

# make a separate data frame just for the missing data in which NAs are converted to the lowest
# expression value minus 2, on a per-gene basis, so all missing values are tied at the same very
# low value, with each value different for a different gene
dfbox$failed = is.na(dfbox$log2exp.conT)
dfbox = ddply(dfbox,.(gene),transform,min = min(log2exp.conT,na.rm=TRUE)-2)
dfbox$log2exp.conT[dfbox$failed] = dfbox$min[dfbox$failed]
dfbox.failed = dfbox[dfbox$failed,]
dfbox$log2exp.conT[dfbox$failed] = NA

# OPTIONAL: plot lung mets by PDX model: HCI-001, HCI-002, HCI-010
pdf("Filename.pdf",w=30,h=30)
ggplot(dfbox,aes(group,log2exp.conT)) +
  geom_boxplot(data=dfbox.stats,outlier.size=NA,fill=NA) +
  geom_point(position=position_jitter(w=0.2,h=0),colour='black') +
  geom_point(data=dfbox.failed,position=position_jitter(w=0.2,h=0.5),colour='red') +
  facet_wrap(~gene,scales="free") + ylab("log2 relative expression, chips normalized by
  tumor cells on a per-gene basis") + myTheme
dev.off()

# OPTIONAL: plot mets by burden (low, intermediate, high, T)
pdf("Filename.pdf",w=30,h=30)
ggplot(dfbox,aes(group,log2exp.conT)) +
  geom_boxplot(data=dfbox.stats,outlier.size=NA,fill=NA) +
```

```
geom_point(position=position_jitter(w=0.2,h=0),colour="black") +
geom_point(data=dfbox.failed,position=position_jitter(w=0.2,h=0.5),colour="red") +
facet_wrap(~gene,scales="free") + ylab("log2 relative expression, chips normalized by
tumor cells on a per-gene basis") + myTheme
dev.off()

# OPTIONAL: plot mets by tissue (T, Lung, lymph node, brain, peripheral blood, bone marrow)
pdf("Filename.pdf",w=30,h=30)
ggplot(dfbox,aes(tissue,log2exp.conT)) +
  geom_boxplot(data=dfbox.stats,outlier.size=NA,fill=NA) +
  geom_point(position=position_jitter(w=0.2,h=0),colour="black") +
  geom_point(data=dfbox.failed,position=position_jitter(w=0.2,h=0.5),colour="red") +
  facet_wrap(~gene,scales="free") + ylab("log2 relative expression, normalized by tumor
cells on a per-gene basis") + myTheme
dev.off()
```

## VII. R Script for identification of differentially expressed genes in normal mammary cells

For the article: Lawson, D.A. *et al.*, Single-cell analysis reveals a stem cell program in human metastatic breast cancer cells.

```
#Load libraries
library(ggplot2)
library(plyr)
library(limma)
library(reshape2)

# Load data from each dynamic array (chip), and then extract tissue type information
# The qPCR data was exported from Fluidigm in the table results format
df1 = read.csv("File location", na.strings = c("999", ""), as.is=TRUE, skip=11)
df1 = df1[,c(1,2,5,7:13)]
names(df1) =
  c("position", "sample", "gene", "ct", "quality", "call", "ct.threshold", "Tm_in_range", "Tm.out.
    range", "Tm.peak.ratio")

df1$tissue = NA
df1$tissue[grep("L", df1$sample)] = "L"
df1$tissue[grep("LP", df1$sample)] = "LP"
df1$tissue[grep("LU", df1$sample)] = "B"

# repeat above for all dynamic arrays, df2, df3, etc.

# combine all dynamic array runs
dfcomb = rbind(df1, df2, df3...)

# remove genes that are 100% failures
dfcomb = ddply(dfcomb,.(gene), transform, removegene = all(is.na(ct)))
dfcomb = dfcomb[!dfcomb$removegene,]

# some sample names repeated across chips, so create a unique id # by pasting together sample
and chip
dfcomb$id = paste(dfcomb$sample, dfcomb$chip)

# Ct normalization: Subtract mean of basal/stem cells on a per-gene, per-array basis to correct for
# batch-to-batch differences
dfcomb = ddply(dfcomb,.(chip, gene), transform, ct.conB = ct -
  mean(ct[tissue=="B"], na.rm=TRUE))
dfcomb$log2exp.conB = -1*dfcomb$ct.conB
```

```
#####
#####
# Three-group comparisons (B vs. L vs. LP)
#####
#####

# define helper computation function first

#####
# START OF FUNCTION DEFINITION
#####

compute.results = function(dfavg,ptypes,filename,sample.column.name,expressionchoice) {

  dfavg$expression.choice = dfavg[,expressionchoice]
  dfavg$sample = dfavg[,sample.column.name]
  dfavg$log2exp = dfavg$expression.choice

  dedata=dfavg

  # retain phenotypes of interest
  dedata = dedata[dedata[,ptypes["phenotype"]] %in%
    c(ptypes["level1"],ptypes["level2"],ptypes["level3"]),]

  # remove genes that failed in all samples
  dedata = dplyr::filter(dedata,(gene),transform,remove = all(is.na(expression.choice)))
  if (sum(dedata$remove)>0) dedata = dedata[-which(dedata$remove),]

  # record how many NA there are per condition for each gene
  genedata = data.frame(unique(dedata$gene), 0, 0, 0, 0, 0,0,0)
  names(genedata) =
    c("gene",ptypes[2],ptypes[3],ptypes[4],"failed.total",paste("failed",ptypes[2],sep="."),pas
    te("failed",ptypes[3],sep="."),paste("failed",ptypes[4],sep="."))
  expres = data.frame(dcast(dedata,sample~gene,value.var =
    "log2exp"),row.names=1,check.names=FALSE)
  pheno = dedata[,ptypes[1]][match(rownames(expres),dedata$sample)]
  pheno = factor(pheno,levels=c(ptypes[2],ptypes[3],ptypes[4]))
  for (i in 1:dim(genedata)[1]) {
    genedata[,ptypes[2]][i] = sum(pheno==ptypes[2]) -
      sum((as.numeric(is.na(t(expres)[match(genedata$gene[i],names(expres)),)]) *
        as.numeric(pheno)) == 1)
    genedata[,ptypes[3]][i] = sum(pheno==ptypes[3]) -
      sum((as.numeric(is.na(t(expres)[match(genedata$gene[i],names(expres)),)]) *
        as.numeric(pheno)) == 2)
    genedata[,ptypes[4]][i] = sum(pheno==ptypes[4]) -
      sum((as.numeric(is.na(t(expres)[match(genedata$gene[i],names(expres)),)]) *

```

```

      as.numeric(pheno)) == 3)
    genedata$failed.total[i] = sum(is.na(t(expres)[match(genedata$gene[i],names(expres)),]))
    genedata[,paste("failed",ptypes[2],sep=".")] [i] =
      sum(is.na(t(expres)[match(genedata$gene[i],names(expres)),]) &
        pheno==ptypes[2])
    genedata[,paste("failed",ptypes[3],sep=".")] [i] =
      sum(is.na(t(expres)[match(genedata$gene[i],names(expres)),]) &
        pheno==ptypes[3])
    genedata[,paste("failed",ptypes[4],sep=".")] [i] =
      sum(is.na(t(expres)[match(genedata$gene[i],names(expres)),]) &
        pheno==ptypes[4])

  }

# convert NA to the lowest expression value minus 0.01, on a per-gene basis, so all missing
# values are tied at the same very low value, with each value different for a different gene
dedata$wasNA = FALSE
dedata$wasNA[is.na(dedata$log2exp)] = TRUE
dedata = ddply(dedata,.(gene),transform,min = min(log2exp,na.rm=TRUE)-0.01)
dedata$log2exp[is.na(dedata$log2exp)] = dedata$min[is.na(dedata$log2exp)]

#####
# ANOVA
#####
an = ddply(dedata,.(gene),summarize,p.an=anova(lm(log2exp~factor(tissue)))[,5][1])
an$FDR.an = p.adjust(an$p.an,method="BH")

#####
# Kruskal-Wallis rank sum test
#####
kw = ddply(dedata,.(gene),summarize,p.kw=kruskal.test(log2exp,factor(tissue))$p.value)
kw$FDR.kw = p.adjust(kw$p.kw,method="BH")

#####
# Merge results
#####
res = merge(genedata,an)
res = merge(res,kw)

#####
# Pick a recommended p and list minimum p
#####
res$p.recommended.type = "p.an"
res$p.recommended.type[(res[,paste("failed",ptypes[2],sep=".")]/(res[,paste("failed",ptypes[2],
  sep=".")]) + res[,ptypes[2]]) > 0.5 |

```



```

      (res[,paste("failed",ptypes[3],sep=".")]/(res[,paste("failed",ptypes[3],sep=".")] +
      res[,ptypes[3]])) > 0.5 |
      (res[,paste("failed",ptypes[4],sep=".")]/(res[,paste("failed",ptypes[4],sep=".")] +
      res[,ptypes[4]])) > 0.5] = "kw"
res$p.recommended = res$p.an
res$p.recommended[res$p.recommended.type=="kw"] =
  res$p.kw[res$p.recommended.type=="kw"]
# compute FDR from list of recommended p values
res$FDR.recommended = p.adjust(res$p.recommended,method="BH")
# sort stats by p value
res = res[order(res$p.recommended),]
# list the minimum across the tests for each gene in separate column
res$p.minimum = apply(res[,c("p.an", "p.kw")],1,function(x) min(x,na.rm=TRUE))
res$FDR.minimum = p.adjust(res$p.minimum,method="BH")

#####
# Write data to a file
#####
write.csv(res,file=filename,quote=FALSE,row.names=FALSE,na="")

# return the data frame of stats
return(res)
}

#####
# END OF FUNCTION DEFINITION
#####

#####
# Use the function defined above to compute statistics: three-group
#####

# compare B, LP, L
ptypes = c(phenotype="tissue",level1="B",level2="LP",level3="L")
resBvsLPvsL = compute.results(dfcomb,ptypes,"Filename.csv","id","log2exp.conB")

#####
#####
# Two-group comparisons (e.g., B vs. L)
#####
#####

# define computation function first

```

```
#####
# START OF FUNCTION DEFINITION
#####

compute.results = function(dfavg,ptypes,filename,sample.column.name,expressionchoice) {

  dfavg$expression.choice = dfavg[,expressionchoice]
  dfavg$sample = dfavg[,sample.column.name]
  dfavg$log2exp = dfavg$expression.choice

  dedata=dfavg

  # retain phenotypes of interest
  dedata = dedata[dedata[,ptypes["phenotype"]] %in% c(ptypes["level1"],ptypes["level2"]),]

  # remove genes that failed in all samples
  dedata = ddply(dedata,.(gene),transform,remove = all(is.na(expression.choice)))
  if (sum(dedata$remove)>0) dedata = dedata[-which(dedata$remove),]

  # record how many NA there are per condition for each gene
  genedata = data.frame(unique(dedata$gene), 0, 0, 0, 0, 0)
  names(genedata) =
    c("gene",ptypes[2],ptypes[3],"failed.total",paste("failed",ptypes[2],sep="."),paste("failed",
    ,ptypes[3],sep="."))
  expres = data.frame(dcast(dedata,sample~gene,value.var =
    "log2exp"),row.names=1,check.names=FALSE)
  pheno = dedata[,ptypes[1]][match(row.names(expres),dedata$sample)]
  pheno = factor(pheno,levels=c(ptypes[2],ptypes[3]))
  for (i in 1:dim(genedata)[1]) {
    genedata[,ptypes[2]][i] = sum(pheno==ptypes[2]) -
      sum((as.numeric(is.na(t(expres)[match(genedata$gene[i],names(expres)),)]) *
      as.numeric(pheno)) == 1)
    genedata[,ptypes[3]][i] = sum(pheno==ptypes[3]) -
      sum((as.numeric(is.na(t(expres)[match(genedata$gene[i],names(expres)),)]) *
      as.numeric(pheno)) == 2)
    genedata$failed.total[i] = sum(is.na(t(expres)[match(genedata$gene[i],names(expres)),)])
    genedata[,paste("failed",ptypes[2],sep=".")][i] =
      sum(is.na(t(expres)[match(genedata$gene[i],names(expres)),)]) &
      pheno==ptypes[2])
    genedata[,paste("failed",ptypes[3],sep=".")][i] =
      sum(is.na(t(expres)[match(genedata$gene[i],names(expres)),)]) &
      pheno==ptypes[3])
  }

  # convert NA to the lowest expression value minus 0.01, on a per-gene basis, so all missing
  # values are tied at the same very low value, with each value different for a different gene
```

```

dedata$wasNA = FALSE
dedata$wasNA[is.na(dedata$log2exp)] = TRUE
dedata = ddply(dedata,.(gene),transform,min = min(log2exp,na.rm=TRUE)-0.01)
dedata$log2exp[is.na(dedata$log2exp)] = dedata$min[is.na(dedata$log2exp)]

#####
# limma
#####
expres = data.frame(dcast(dedata,sample~gene,value.var =
  "log2exp"),row.names=1,check.names=FALSE)
pheno = dedata[,ptypes[1]][match(rownames(expres),dedata$sample)]
pheno = factor(pheno,levels=c(ptypes[2],ptypes[3]))
design = model.matrix(~pheno)
fit=lmFit(t(expres),design)
fit=eBayes(fit)
limma = topTable(fit, coef=2, adjust.method="BH", sort.by="p", number=1000)
limma = limma[,-which(names(limma)=="B")]
names(limma) = paste(names(limma),"limma",sep=".")
names(limma)[which(names(limma)=="ID.limma")] = "gene"
names(limma)[which(names(limma)=="adj.P.Val.limma")] = "FDR.limma"
names(limma)[which(names(limma)=="P.Value.limma")] = "p.limma"

#####
# Mann-Whitney
#####
wilcox = ddply(dedata,.(gene),.fun = function(x,colname) summarize(x,logFC.wilcox =
  mean(x[,"log2exp"][x[,colname]==ptypes["level2"]],na.rm=TRUE)-
  mean(x[,"log2exp"][x[,colname]==ptypes["level1"]],na.rm=TRUE),logFC.NAexcluded
  = mean(x[,"log2exp"][x[,colname]==ptypes["level2"]] &
  x[,"wasNA"]!=TRUE],na.rm=TRUE)-
  mean(x[,"log2exp"][x[,colname]==ptypes["level1"]] &
  x[,"wasNA"]!=TRUE],na.rm=TRUE),p.wilcox =
  wilcox.test(x[,"log2exp"][x[,colname]==ptypes["level2"]],x[,"log2exp"][x[,colname]==p
  types["level1"]])$p.value),colname=ptypes[1])
wilcox$FDR.wilcox = p.adjust(wilcox$p.wilcox,method="BH")

#####
# Welch t
#####
welch = ddply(dedata,.(gene),.fun = function(x,colname) summarize(x,p.welch =
  t.test(x[,"log2exp"][x[,colname]==ptypes["level2"]],x[,"log2exp"][x[,colname]==ptypes[
  "level1"]])$p.value),colname=ptypes[1])
welch$FDR.welch = p.adjust(welch$p.welch,method="BH")

```

```
#####
# Merge results
#####
res = merge(genedata,limma)
res = merge(res,wilcox)
res = merge(res,welch)

#####
# Pick a recommended p and list minimum p
#####
# recommended, and sort list based on this p value
res$p.recommended.type = "t.limma"
res$p.recommended.type[(res[,paste("failed",ptypes[2],sep=".")]/(res[,paste("failed",ptypes[2],se
p=".")]) + res[,ptypes[2]]) > 0.5 |
(res[,paste("failed",ptypes[3],sep=".")]/(res[,paste("failed",ptypes[3],sep=".")]) +
res[,ptypes[3]]) > 0.5] = "wilcox"
res$p.recommended = res$p.limma
res$p.recommended[res$p.recommended.type=="wilcox"] =
res$p.wilcox[res$p.recommended.type=="wilcox"]
res$FDR.recommended = p.adjust(res$p.recommended,method="BH")
res = res[order(res$p.recommended),]
# minimum
res$p.minimum = apply(res[,c("p.limma","p.wilcox","p.welch")],1,function(x)
min(x,na.rm=TRUE))
res$FDR.minimum = p.adjust(res$p.minimum,method="BH")

#####
# Write data
#####
write.csv(res,file=filename,quote=FALSE,row.names=FALSE,na="")

return(res)
}

#####
# END OF FUNCTION DEFINITION
#####

#####
# Use the function defined above to compute statistics: two-group
#####

# grouped comparison (B vs. (L+LP))
dfcomb$group = "L+LP"
dfcomb$group[dfcomb$tissue=="B"] = "B"
ptypes = c(phenotype="group",level1="L+LP",level2="B")
```

```
resBvsLLP = compute.results(dfcomb,ptypes,"Filename.csv","id","log2exp.conB")

# pairwise comparison (L vs. B)
dfcomb$group = "B"
dfcomb$group[dfcomb$tissue=="L"] = "L"
ptypes = c(phenotype="group",level1="B",level2="L")
resLvsB = compute.results(dfcomb,ptypes,"Filename.csv","id","log2exp.conB")

# pairwise comparison (LP vs. L)
dfcomb$group = "L"
dfcomb$group[dfcomb$tissue=="LP"] = "LP"
ptypes = c(phenotype="group",level1="L",level2="LP")
resLPvsL = compute.results(dfcomb,ptypes,"Filename.csv","id","log2exp.conB")
```

## VIII. R Script for identification of differentially expressed genes in cancer cell populations

For the article: Lawson, D.A. *et al.*, Single-cell analysis reveals a stem cell program in human metastatic breast cancer cells.

# In this study, there were several types of differential expression analyses:

4. Lung vs. lymph node vs. brain vs. peripheral blood vs. bone marrow mets– 5 groups
5. Low-burden mets vs primary tumor cells – 2 groups
6. High-burden mets and primary tumor cells – 2 groups
7. High-burden mets vs low-burden mets – 2 groups
8. Lung mets from HCI-001 vs. HCI-002 vs. HCI-010 – 3 groups

#Load libraries

```
library(ggplot2)
```

```
library(plyr)
```

```
library(limma)
```

```
library(reshape2)
```

```
library(PMCMR)
```

# Load data from each dynamic array (chip), and then extract tissue type information

# The qPCR data was exported from Fluidigm in the table results format

```
df1 = read.csv("File location", na.strings = c("999", ""), as.is=TRUE, skip=11)
```

```
df1 = df1[,c(1,2,5,7:13)]
```

```
names(df1) =
```

```
  c("position", "sample", "gene", "ct", "quality", "call", "ct.threshold", "Tm_in_range", "Tm.out.
    range", "Tm.peak.ratio")
```

```
df1$chip = "1"
```

```
df1$tissue = NA
```

```
df1$tissue[grep("T", df1$sample)] = "T"
```

```
df1$tissue[grep("LN", df1$sample)] = "LN"
```

```
df1$tissue[grep("LU", df1$sample)] = "LU"
```

```
df1$tissue[grep("BR", df1$sample)] = "BR"
```

```
df1$tissue[grep("BM", df1$sample)] = "BM"
```

```
df1$tissue[grep("BM", df1$sample)] = "PB"
```

# combine all dynamic array runs

```
dfcomb = rbind(df1, df2, df3...)
```

# OPTIONAL: retain only genes that were run on all chips

```
dfcomb = ddply(dfcomb,.(gene),transform,commongene =
```

```
  length(unique(chip))==length(unique(dfcomb$chip)))
```

```
dfcomb = dfcomb[dfcomb$commongene,]
```

# remove genes that are 100% failures

```
dfcomb = ddply(dfcomb,.(gene),transform,removegene = all(is.na(ct)))
```

```

dfcomb = dfcomb[!dfcomb$removegene,]

# some sample names repeated across chips, so create a unique id # by pasting together sample
and chip
dfcomb$id = paste(dfcomb$sample,dfcomb$chip)

# Ct normalization: Subtract mean of basal/stem cells on a per-gene, per-array basis to correct for
# batch-to-batch differences
dfcomb = ddply(dfcomb,.(chip,gene),transform,ct.conT = ct -
              mean(ct[tissue=="T"],na.rm=TRUE))
dfcomb$log2exp.conT = -1*dfcomb$ct.conT

# OPTIONAL: generate groups to manually designate colors by ID (specific cells)
# For grouping based on low, intermediate, and high burden, and tumor:
dfcomb$group = "nogroup"
dfcomb$group[dfcomb$id %in% c("LN1 1","LN2 1","LN3 1",...)] = "low"
dfcomb$group[dfcomb$id %in% c("LN4 1","LN5 1","LN6 1",...)] = "intermediate"
dfcomb$group[dfcomb$id %in% c("LN7 1","LN8 1","LN9 1",...)] = "high"
dfcomb$group[dfcomb$tissue=="T"] = "T"
dfcomb = dfcomb[dfcomb$group!="nogroup",]

#####
#####
# Two-group comparisons (e.g., low-burden mets vs. primary tumor cells)
#####
#####

# define helper computation function first

#####
# START OF FUNCTION DEFINITION
#####

compute.results = function(dfavg,ptypes,filename,sample.column.name,expressionchoice) {

  dfavg$expression.choice = dfavg[,expressionchoice]
  dfavg$sample = dfavg[,sample.column.name]
  dfavg$log2exp = dfavg$expression.choice

  dedata=dfavg

  # retain phenotypes of interest
  dedata = dedata[dedata[,ptypes["phenotype"]] %in% c(ptypes["level1"],ptypes["level2"]),]

  # remove genes that do not have at least three non-NA values for each level of the phenotype

```

```

dedata = ddply(dedata,.(gene),.fun = function(x,colname) transform(x,remove =
  sum(!is.na(x[,"log2exp"])[x[,colname]==ptypes["level2"]])<3 |
  sum(!is.na(x[,"log2exp"])[x[,colname]==ptypes["level1"]])<3),colname=ptypes[1])
if (sum(dedata$remove)>0) dedata = dedata[-which(dedata$remove),]

# record how many NA there are per condition for each gene
genedata = data.frame(unique(dedata$gene), 0, 0, 0, 0, 0)
names(genedata) =
  c("gene",ptypes[2],ptypes[3],"failed.total",paste("failed",ptypes[2],sep="."),paste("failed"
  ,ptypes[3],sep="."))
expres = data.frame(dcast(dedata,sample~gene,value.var =
  "log2exp"),row.names=1,check.names=FALSE)
pheno = dedata[,ptypes[1]][match(rownames(expres),dedata$sample)]
pheno = factor(pheno,levels=c(ptypes[2],ptypes[3]))
for (i in 1:dim(genedata)[1]) {
  genedata[,ptypes[2]][i] = sum(pheno==ptypes[2]) -
    sum((as.numeric(is.na(t(expres)[match(genedata$gene[i],names(expres)),)]) *
    as.numeric(pheno)) == 1)
  genedata[,ptypes[3]][i] = sum(pheno==ptypes[3]) -
    sum((as.numeric(is.na(t(expres)[match(genedata$gene[i],names(expres)),)]) *
    as.numeric(pheno)) == 2)
  genedata$failed.total[i] = sum(is.na(t(expres)[match(genedata$gene[i],names(expres)),)])
  genedata[,paste("failed",ptypes[2],sep=".")][i] =
    sum(is.na(t(expres)[match(genedata$gene[i],names(expres)),)]) &
    pheno==ptypes[2])
  genedata[,paste("failed",ptypes[3],sep=".")][i] =
    sum(is.na(t(expres)[match(genedata$gene[i],names(expres)),)]) &
    pheno==ptypes[3])
}

# convert NA to the lowest expression value minus 0.01, on a per-gene basis, so all missing
# values are tied at the same very low value, with each value different for a different gene
dedata$wasNA = FALSE
dedata$wasNA[is.na(dedata$log2exp)] = TRUE
dedata = ddply(dedata,.(gene),transform,min = min(log2exp,na.rm=TRUE)-0.01)
dedata$log2exp[is.na(dedata$log2exp)] = dedata$min[is.na(dedata$log2exp)]

#####
# limma
#####
expres = data.frame(dcast(dedata,sample~gene,value.var =
  "log2exp"),row.names=1,check.names=FALSE)
pheno = dedata[,ptypes[1]][match(rownames(expres),dedata$sample)]
pheno = factor(pheno,levels=c(ptypes[2],ptypes[3]))
design = model.matrix(~pheno)
fit=lmFit(t(expres),design)

```



```

fit=eBayes(fit)
limma = topTable(fit, coef=2, adjust.method="BH", sort.by="p", number=1000)
limma = limma[,-which(names(limma)=="B")]
names(limma) = paste(names(limma),"limma",sep=".")
names(limma)[which(names(limma)=="ID.limma")] = "gene"
names(limma)[which(names(limma)=="adj.P.Val.limma")] = "FDR.limma"
names(limma)[which(names(limma)=="P.Value.limma")] = "p.limma"

#####
# Mann-Whitney
#####
wilcox = ddply(dedata,.(gene),.fun = function(x,colname) summarize(x,logFC.wilcox =
  mean(x[,"log2exp"][x[,colname]==ptypes["level2"]],na.rm=TRUE)-
  mean(x[,"log2exp"][x[,colname]==ptypes["level1"]],na.rm=TRUE),logFC.NAexcluded
  = mean(x[,"log2exp"][x[,colname]==ptypes["level2"] &
  x[,"wasNA"]!=TRUE],na.rm=TRUE)-
  mean(x[,"log2exp"][x[,colname]==ptypes["level1"] &
  x[,"wasNA"]!=TRUE],na.rm=TRUE),p.wilcox =
  wilcox.test(x[,"log2exp"][x[,colname]==ptypes["level2"]],x[,"log2exp"][x[,colname]==p
  types["level1"]])$p.value),colname=ptypes[1])
wilcox$FDR.wilcox = p.adjust(wilcox$p.wilcox,method="BH")

#####
# Welch t
#####
welch = ddply(dedata,.(gene),.fun = function(x,colname) summarize(x,p.welch =
  t.test(x[,"log2exp"][x[,colname]==ptypes["level2"]],x[,"log2exp"][x[,colname]==ptypes[
  "level1"]])$p.value),colname=ptypes[1])
welch$FDR.welch = p.adjust(welch$p.welch,method="BH")

#####
# Merge results
#####
res = merge(genedata,limma)
res = merge(res,wilcox)
res = merge(res,welch)

#####
# Pick a recommended p and list minimum p
#####
# recommended, and sort list based on this p value
res$p.recommended.type = "t.limma"
res$p.recommended.type[(res[,paste("failed",ptypes[2],sep=".")]/(res[,paste("failed",ptypes[2],se
p=".")]) + res[,ptypes[2]]) > 0.5 |
(res[,paste("failed",ptypes[3],sep=".")]/(res[,paste("failed",ptypes[3],sep=".")]) +
res[,ptypes[3]]) > 0.5] = "wilcox"

```

```

res$p.recommended = res$p.limma
res$p.recommended[res$p.recommended.type=="wilcox"] =
res$p.wilcox[res$p.recommended.type=="wilcox"]
res$FDR.recommended = p.adjust(res$p.recommended,method="BH")
res = res[order(res$p.recommended),]
# minimum
res$p.minimum = apply(res[,c("p.limma", "p.wilcox", "p.welch")],1,function(x)
  min(x,na.rm=TRUE))
res$FDR.minimum = p.adjust(res$p.minimum,method="BH")

#####
# Write data
#####
write.csv(res,file=filename,quote=FALSE,row.names=FALSE,na="")

return(res)
}

#####
# END OF FUNCTION DEFINITION
#####

#####
# Use the function defined above to compute statistics: two-group
#####

# OPTIONAL: now, use the above function for low-burden mets vs. primary tumor cells
ptypes = c(phenotype="group",level1="T",level2="low")
resLowvsT = compute.results(dfcomb,ptypes,"Filename.csv","id","log2exp.conT")

# OPTIONAL: now, use the above function for high-burden mets vs. primary tumor cells
ptypes = c(phenotype="group",level1="T",level2="high")
resHighvsT = compute.results(dfcomb,ptypes,"Filename.csv","id","log2exp.conT")

# OPTIONAL: now, use the above function for high-burden mets vs. low-burden mets
ptypes = c(phenotype="group",level1="low",level2="high")
resHighvsLow =
  compute.results(dfcomb,ptypes,"Filename.csv","id","log2exp.conT")

#####
#####
# Three-group comparisons (HCI-001 vs. HCI-002 vs. HCI-010)
#####
#####

# define helper computation function first

```

```
#####
# START OF FUNCTION DEFINITION
#####

compute.results = function(dfavg,ptypes,filename,sample.column.name,expressionchoice) {

  dfavg$expression.choice = dfavg[,expressionchoice]
  dfavg$sample = dfavg[,sample.column.name]
  dfavg$log2exp = dfavg$expression.choice
  dfavg$grouping = dfavg[,ptypes[1]]

  dedata=dfavg

  # retain phenotypes of interest
  dedata = dedata[dedata[,ptypes["phenotype"]] %in%
    c(ptypes["level1"],ptypes["level2"],ptypes["level3"]),]

  # get rid of genes that don't have at least 3 non-NA values for each level of the phenotype
  dedata = ddply(dedata,.(gene),.fun = function(x,colname) transform(x,remove =
    sum(!is.na(x[, "log2exp"][x[,colname]==ptypes["level2"]]))<3 |
    sum(!is.na(x[, "log2exp"][x[,colname]==ptypes["level1"]]))<3 |
    sum(!is.na(x[, "log2exp"][x[,colname]==ptypes["level3"]]))<3),colname=ptypes[1])
  if (sum(dedata$remove)>0) dedata = dedata[-which(dedata$remove),]

  # record how many NA there are per condition for each gene
  genedata = data.frame(unique(dedata$gene), 0, 0, 0, 0, 0,0,0)
  names(genedata) =
    c("gene",ptypes[2],ptypes[3],ptypes[4], "failed.total",paste("failed",ptypes[2],sep="."),paste("failed",ptypes[3],sep="."),paste("failed",ptypes[4],sep="."))
  expres = data.frame(dcast(dedata,sample~gene,value.var =
    "log2exp"),row.names=1,check.names=FALSE)
  pheno = dedata[,ptypes[1]][match(rownames(expres),dedata$sample)]
  pheno = factor(pheno,levels=c(ptypes[2],ptypes[3],ptypes[4]))
  for (i in 1:dim(genedata)[1]) {
    genedata[,ptypes[2]][i] = sum(pheno==ptypes[2]) -
      sum((as.numeric(is.na(t(expres)[match(genedata$gene[i],names(expres)),)]) *
        as.numeric(pheno)) == 1)
    genedata[,ptypes[3]][i] = sum(pheno==ptypes[3]) -
      sum((as.numeric(is.na(t(expres)[match(genedata$gene[i],names(expres)),)]) *
        as.numeric(pheno)) == 2)
    genedata[,ptypes[4]][i] = sum(pheno==ptypes[4]) -
      sum((as.numeric(is.na(t(expres)[match(genedata$gene[i],names(expres)),)]) *
        as.numeric(pheno)) == 3)
    genedata$failed.total[i] = sum(is.na(t(expres)[match(genedata$gene[i],names(expres)),)])
  }
}
```

```

genedata[,paste("failed",ptypes[2],sep=".")] [i] =
  sum(is.na(t(expres)[match(genedata$gene[i],names(expres)),]) &
    pheno==ptypes[2])
genedata[,paste("failed",ptypes[3],sep=".")] [i] =
  sum(is.na(t(expres)[match(genedata$gene[i],names(expres)),]) &
    pheno==ptypes[3])
genedata[,paste("failed",ptypes[4],sep=".")] [i] =
  sum(is.na(t(expres)[match(genedata$gene[i],names(expres)),]) &
    pheno==ptypes[4])
}

# convert NA to the lowest expression value minus 0.01, on a per-gene basis, so all missing
# values are tied at the same very low value, with each value different for a different gene
dedata$wasNA = FALSE
dedata$wasNA[is.na(dedata$log2exp)] = TRUE
dedata = ddply(dedata,.(gene),transform,min = min(log2exp,na.rm=TRUE)-0.01)
dedata$log2exp[is.na(dedata$log2exp)] = dedata$min[is.na(dedata$log2exp)]

#####
# With anova
#####
an = ddply(dedata,.(gene),summarize,p.an=anova(lm(log2exp~factor(grouping)))[,5][1])
an$FDR.an = p.adjust(an$p.an,method="BH")

#####
# Kruskal-Wallis rank sum test
#####
kw = ddply(dedata,.(gene),summarize,p.kw=kruskal.test(log2exp,factor(grouping))$p.value)
kw$FDR.kw = p.adjust(kw$p.kw,method="BH")

#####
# Merge results
#####
res = merge(genedata,an)
res = merge(res,kw)

#####
# Pick a recommended p and list minimum p
#####
# recommended, and sort list based on this p value
res$p.recommended.type = "p.an"
res$p.recommended.type[(res[,paste("failed",ptypes[2],sep=".")]/(res[,paste("failed",ptypes[2],s
ep=".")]) + res[,ptypes[2]]) > 0.5 |
(res[,paste("failed",ptypes[3],sep=".")]/(res[,paste("failed",ptypes[3],sep=".")]) +
res[,ptypes[3]]) > 0.5 |

```

```

      (res[,paste("failed",ptypes[4],sep=".")]/(res[,paste("failed",ptypes[4],sep=".")] +
      res[,ptypes[4]])) > 0.5] = "kw"
res$p.recommended = res$p.an
res$p.recommended[res$p.recommended.type=="kw"] =
  res$p.kw[res$p.recommended.type=="kw"]
res$FDR.recommended = p.adjust(res$p.recommended,method="BH")
res = res[order(res$p.recommended),]
# minimum
res$p.minimum = apply(res[,c("p.an","p.kw")],1,function(x) min(x,na.rm=TRUE))
res$FDR.minimum = p.adjust(res$p.minimum,method="BH")

#####
# Write data
#####
write.csv(res,file=filename,quote=FALSE,row.names=FALSE,na="")

return(res)
}

#####
# END OF FUNCTION DEFINITION
#####

#####
# Use the function defined above to compute statistics: three-group
#####

# OPTIONAL: generate groups to manually designate colors by ID (specific cells)
# For grouping based on PDX model: (Note: In the study, this was only done on lung mets)
dfcomb$group = "nogroup"
dfcomb$group[dfcomb$id %in% c("LU1 1","LU2 1","LU3 1",...)] = "HCI-001"
dfcomb$group[dfcomb$id %in% c("LU4 1","LU5 1","LU6 1",...)] = "HCI-002"
dfcomb$group[dfcomb$id %in% c("LU7 1","LU8 1","LU9 1",...)] = "HCI-010"
dfcomb = dfcomb[dfcomb$group!="nogroup",]

# HCI-001 vs. HCI-002 vs. HCI-010
ptypes = c(phenotype="group",level1="HCI-001",level2="HCI-002",level3="HCI-010")
res1vs2vs10 = compute.results(dfcomb,ptypes, "Filename.csv","id","log2exp.conT")

#####
#####
# Five-group comparisons (5 metastatic tissues)
# with post-hoc pairwise comparisons
#####
#####

```

```

# define helper computation function first

#####
# START OF FUNCTION DEFINITION
#####

compute.results = function(dfavg,ptypes,filename,sample.column.name,expressionchoice) {

  dfavg$expression.choice = dfavg[,expressionchoice]
  dfavg$sample = dfavg[,sample.column.name]
  dfavg$log2exp = dfavg$expression.choice

  dedata=dfavg

  # retain phenotypes of interest
  dedata = dedata[dedata[,ptypes["phenotype"]] %in%
    c(ptypes["level1"],ptypes["level2"],ptypes["level3"],ptypes["level4"],ptypes["level5"]),]

  # remove genes that failed in all samples
  dedata = ddply(dedata,.(gene),transform,remove = all(is.na(expression.choice)))
  if (sum(dedata$remove)>0) dedata = dedata[-which(dedata$remove),]

  # remove genes that only have one tissue type
  dedata = ddply(dedata,.(gene),transform,remove=length(unique(tissue))==1)
  if (sum(dedata$remove)>0) dedata = dedata[-which(dedata$remove),]

  # record how many NA there are per condition for each gene
  genedata = data.frame(unique(dedata$gene), 0, 0, 0, 0, 0, 0, 0, 0, 0, 0, 0)
  names(genedata) =
    c("gene",ptypes[2],ptypes[3],ptypes[4],ptypes[5],ptypes[6],"failed.total",paste("failed",pt
      ypes[2],sep="."),paste("failed",ptypes[3],sep="."),paste("failed",ptypes[4],sep="."),paste(
        "failed",ptypes[5],sep="."),paste("failed",ptypes[6],sep="."))
  expres = data.frame(dcast(dedata,sample~gene,value.var =
    "log2exp"),row.names=1,check.names=FALSE)
  pheno = dedata[,ptypes[1]][match(row.names(expres),dedata$sample)]
  pheno = factor(pheno,levels=c(ptypes[2],ptypes[3],ptypes[4],ptypes[5],ptypes[6]))
  for (i in 1:dim(genedata)[1]) {
    genedata[,ptypes[2]][i] = sum(pheno==ptypes[2]) -
      sum((as.numeric(is.na(t(expres)[match(genedata$gene[i],names(expres)),)]) *
        as.numeric(pheno)) == 1)
    genedata[,ptypes[3]][i] = sum(pheno==ptypes[3]) -
      sum((as.numeric(is.na(t(expres)[match(genedata$gene[i],names(expres)),)]) *
        as.numeric(pheno)) == 2)
    genedata[,ptypes[4]][i] = sum(pheno==ptypes[4]) -
      sum((as.numeric(is.na(t(expres)[match(genedata$gene[i],names(expres)),)]) *
        as.numeric(pheno)) == 3)
  }
}

```

```

genedata[,ptypes[5]][i] = sum(pheno==ptypes[5]) -
  sum((as.numeric(is.na(t(expres)[match(genedata$gene[i],names(expres)),)]) *
    as.numeric(pheno)) == 4)
genedata[,ptypes[6]][i] = sum(pheno==ptypes[6]) -
  sum((as.numeric(is.na(t(expres)[match(genedata$gene[i],names(expres)),)]) *
    as.numeric(pheno)) == 5)
genedata$failed.total[i] =
  sum(is.na(t(expres)[match(genedata$gene[i],names(expres)),)])
genedata[,paste("failed",ptypes[2],sep=".")][i] =
  sum(is.na(t(expres)[match(genedata$gene[i],names(expres)),]) &
    pheno==ptypes[2])
genedata[,paste("failed",ptypes[3],sep=".")][i] =
  sum(is.na(t(expres)[match(genedata$gene[i],names(expres)),]) &
    pheno==ptypes[3])
genedata[,paste("failed",ptypes[4],sep=".")][i] =
  sum(is.na(t(expres)[match(genedata$gene[i],names(expres)),]) &
    pheno==ptypes[4])
genedata[,paste("failed",ptypes[5],sep=".")][i] =
  sum(is.na(t(expres)[match(genedata$gene[i],names(expres)),]) &
    pheno==ptypes[5])
genedata[,paste("failed",ptypes[6],sep=".")][i] =
  sum(is.na(t(expres)[match(genedata$gene[i],names(expres)),]) &
    pheno==ptypes[6])
}

```

```

# convert NA to the lowest expression value minus 0.01, on a per-gene basis, so all missing
# values are tied at the same very low value, with each value different for a different gene
dedata$wasNA = FALSE

```

```

dedata$wasNA[is.na(dedata$log2exp)] = TRUE

```

```

dedata = ddply(dedata,.(gene),transform,min = min(log2exp,na.rm=TRUE)-0.01)

```

```

dedata$log2exp[is.na(dedata$log2exp)] = dedata$min[is.na(dedata$log2exp)]

```

```

#####

```

```

# With anova

```

```

#####

```

```

an = ddply(dedata,.(gene),summarize,p.an=anova(lm(log2exp~factor(tissue)))[,5][1])

```

```

an$FDR.an = p.adjust(an$p.an,method="BH")

```

```

#####

```

```

# Kruskal-Wallis rank sum test

```

```

#####

```

```

kw = ddply(dedata,.(gene),summarize,p.kw=kruskal.test(log2exp,factor(tissue))$p.value)

```

```

kw$FDR.kw = p.adjust(kw$p.kw,method="BH")

```

```
#####
# Merge results
#####
res = merge(genedata,an)
res = merge(res,kw)

#####
# Pick a recommended p and list minimum p
#####
# recommended, and sort list based on this p value
res$p.recommended.type = "p.an"
res$p.recommended.type[(res[,paste("failed",ptypes[2],sep=".")]/(res[,paste("failed",ptypes[2],sep=".")]) + res[,ptypes[2]]) > 0.5 |
(res[,paste("failed",ptypes[3],sep=".")]/(res[,paste("failed",ptypes[3],sep=".")]) + res[,ptypes[3]]) > 0.5 |
(res[,paste("failed",ptypes[4],sep=".")]/(res[,paste("failed",ptypes[4],sep=".")]) + res[,ptypes[4]]) > 0.5 |
(res[,paste("failed",ptypes[5],sep=".")]/(res[,paste("failed",ptypes[5],sep=".")]) + res[,ptypes[5]]) > 0.5 |
(res[,paste("failed",ptypes[6],sep=".")]/(res[,paste("failed",ptypes[6],sep=".")]) + res[,ptypes[6]]) > 0.5] = "kw"
res$p.recommended = res$p.an
res$p.recommended[res$p.recommended.type=="kw"] =
  res$p.kw[res$p.recommended.type=="kw"]
res$FDR.recommended = p.adjust(res$p.recommended,method="BH")
res = res[order(res$p.recommended),]
# minimum
res$p.minimum = apply(res[,c("p.an", "p.kw")],1,function(x) min(x,na.rm=TRUE))
res$FDR.minimum = p.adjust(res$p.minimum,method="BH")

#####
# Post-hoc multiple pair-wise comparisons
#####

# subset data to retain genes that have FDR < 0.05 for the comparison across all groups
ress = res[res$FDR.recommended < 0.05,]

# only run the post-hoc code if any FDR.recommended is < 0.05
if (dim(ress)[1]!=0) {

# for each gene, if anova was recommended above, then do all post-hoc pairwise comparisons
# using TukeyHSD; if kruskal-wallis was recommended, use posthoc.kruskal.nemenyi.test
# with Chisquare method given ties in failures

# first set up data frame to populate with the post-hoc p value results from tukey
```



```

res.posthoc = data.frame(gene="gene",rec.group.test="rec.p",pvalues =
  "pvalues",stringsAsFactors=FALSE)

# second set up a data frame to populate with the post-hoc logFC results
res.posthoc.logFC = data.frame(gene="gene",rec.group.test="rec.p",logFC =
  "logFC",stringsAsFactors=FALSE)

# now, loop through for each gene
for (i in 1:dim(ress)[1]) {

  # if anova was recommended, run this to populate p value data frame
  if (ress$p.recommended.type[i]=="p.an") {
    cur.post.hoc =
      TukeyHSD(aov(log2exp~tissue,data=dedata[dedata$gene==ress$gene[i],]))
    cur.post.hoc = cur.post.hoc$tissue
    cur.post.hoc = paste(rownames(cur.post.hoc),cur.post.hoc[,"p adj"])
    cur.post.hoc = data.frame(gene=as.character(ress$gene[i]),
      rec.group.test=as.character(ress$p.recommended.type[i]),paste(cur.post.hoc,colla
      pse=" "),stringsAsFactors=FALSE)
    res.posthoc[i,] = cur.post.hoc

  } # end of "if anova"

  # if kruskal-wallis was recommended, run this to populate p value data frame
  if (ress$p.recommended.type[i]=="kw") {
    cur.post.hoc =
      posthoc.kruskal.nemenyi.test(x=dedata[dedata$gene==ress$gene[i],"log2exp"],
      g=dedata[dedata$gene==ress$gene[i],"tissue"], method="Chisquare")
    cur.post.hoc = melt(cur.post.hoc$p.value)
    cur.post.hoc = cur.post.hoc[!is.na(cur.post.hoc$value),]
    cur.post.hoc$name = paste(cur.post.hoc$Var1,cur.post.hoc$Var2)
    cur.post.hoc = paste(cur.post.hoc$name,cur.post.hoc$value)
    cur.post.hoc = data.frame(gene=as.character(ress$gene[i]),
      rec.group.test=as.character(ress$p.recommended.type[i]),paste(cur.post.hoc,colla
      pse=" "),stringsAsFactors=FALSE)
    res.posthoc[i,] = cur.post.hoc

  } # end of "if kruskal-wallis"

  # populate logFC data frame
  cur.post.hoc =
    TukeyHSD(aov(log2exp~tissue,data=dedata[dedata$gene==ress$gene[i],]))
  cur.post.hoc = cur.post.hoc$tissue
  cur.post.hoc = paste(rownames(cur.post.hoc),cur.post.hoc[,"diff"])

```

```

cur.post.hoc.logFC = data.frame(gene=as.character(ress$gene[i]),
  rec.group.test=as.character(ress$p.recommended.type[i]),paste(cur.post.hoc,collapse=" "),stringsAsFactors=FALSE)
res.posthoc.logFC[i,] = cur.post.hoc.logFC

} # end of for loop

} # end of if any FDR.recommend < 0.05

#####
# Write data
#####
write.csv(res,file=filename,quote=FALSE,row.names=FALSE,na="")

if (dim(ress)[1]!=0) {
posthoc.filename = sub(".csv","",filename,fixed=TRUE)
posthoc.filename = paste(posthoc.filename,"-posthoc-pairwise.csv",sep="")
posthoc.filename.logFC = sub("pairwise","pairwise-logFC",posthoc.filename,fixed=TRUE)
write.csv(res.posthoc,file=posthoc.filename,quote=FALSE,row.names=FALSE,na="")
write.csv(res.posthoc.logFC,file=posthoc.filename.logFC,quote=FALSE,row.names=FALSE,na="")
}

return(res)
}

#####
# Use the function defined above to compute statistics: five-group
#####

# Now, use the above function for LU vs. LN vs. BM vs. PB vs. BR
ptypes =
  c(phenotype="tissue",level1="LU",level2="LN",level3="BM",level4="PB",level5="BR"
  )
restissues = compute.results(dfcomb,ptypes, "Filename.csv","id","log2exp.conT")

```

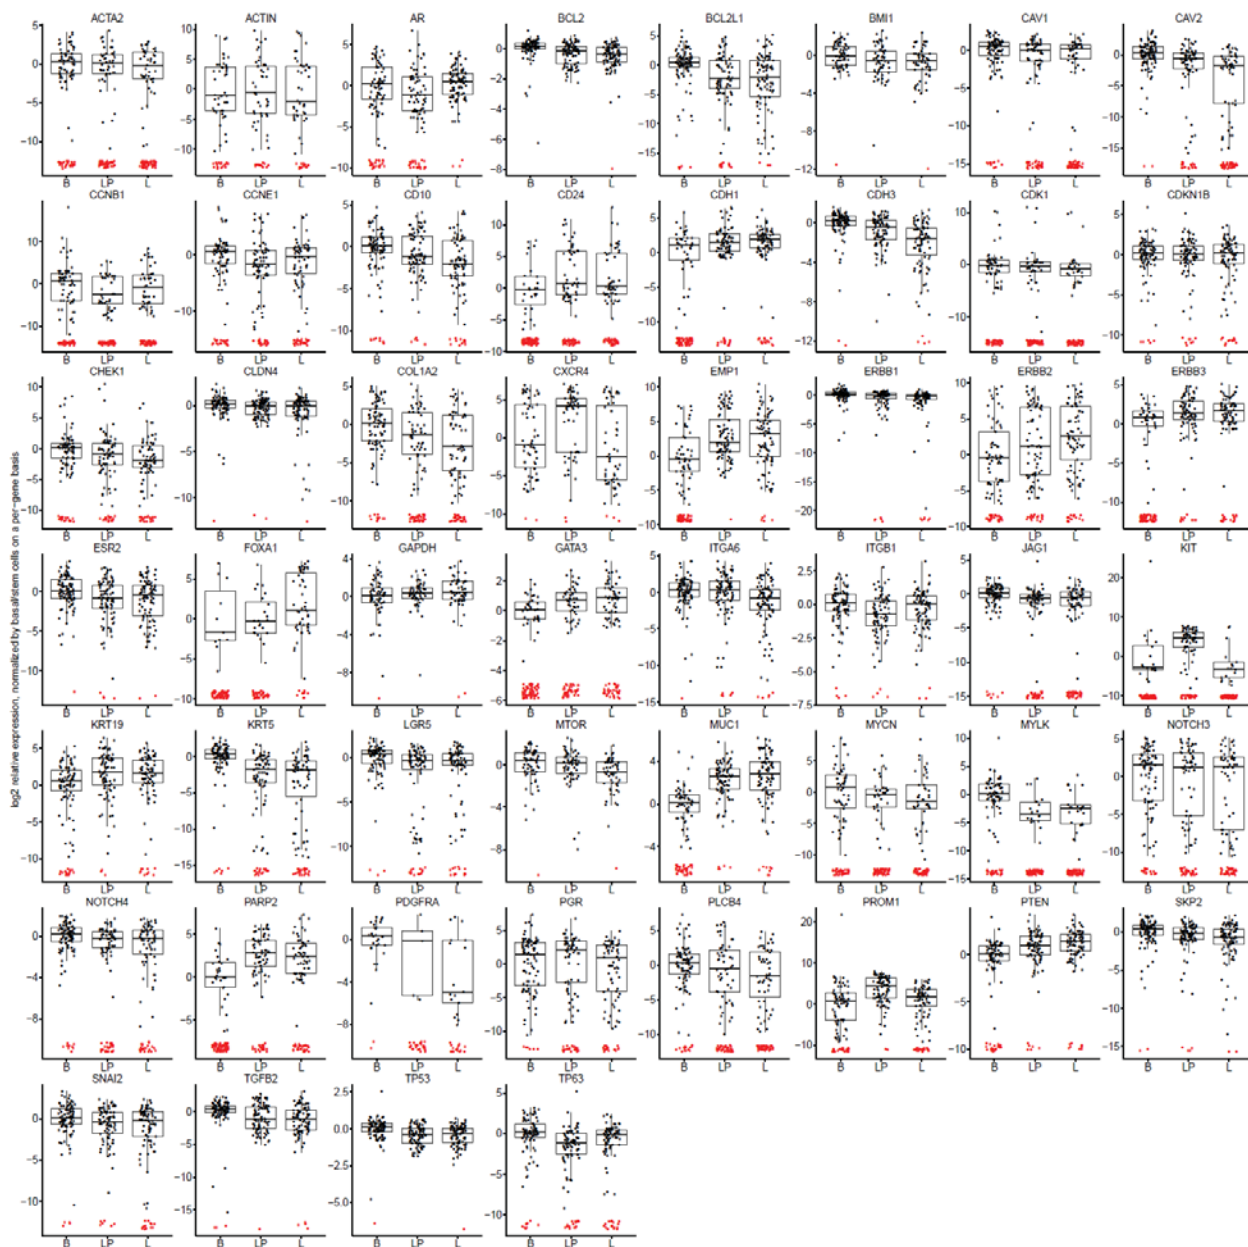

**Supplementary Data 1: Gene expression in individual basal/stem, luminal, and luminal progenitor cells.** Box plots show expression levels for each gene from the 49-gene differentiation signature in individual cells. P-values and fold change for each gene are shown in **Supplementary Table 2**. Black dots, single cells; red dots, single cells with no expression. B, basal; LP, luminal progenitor; L, luminal.

# HCI-001

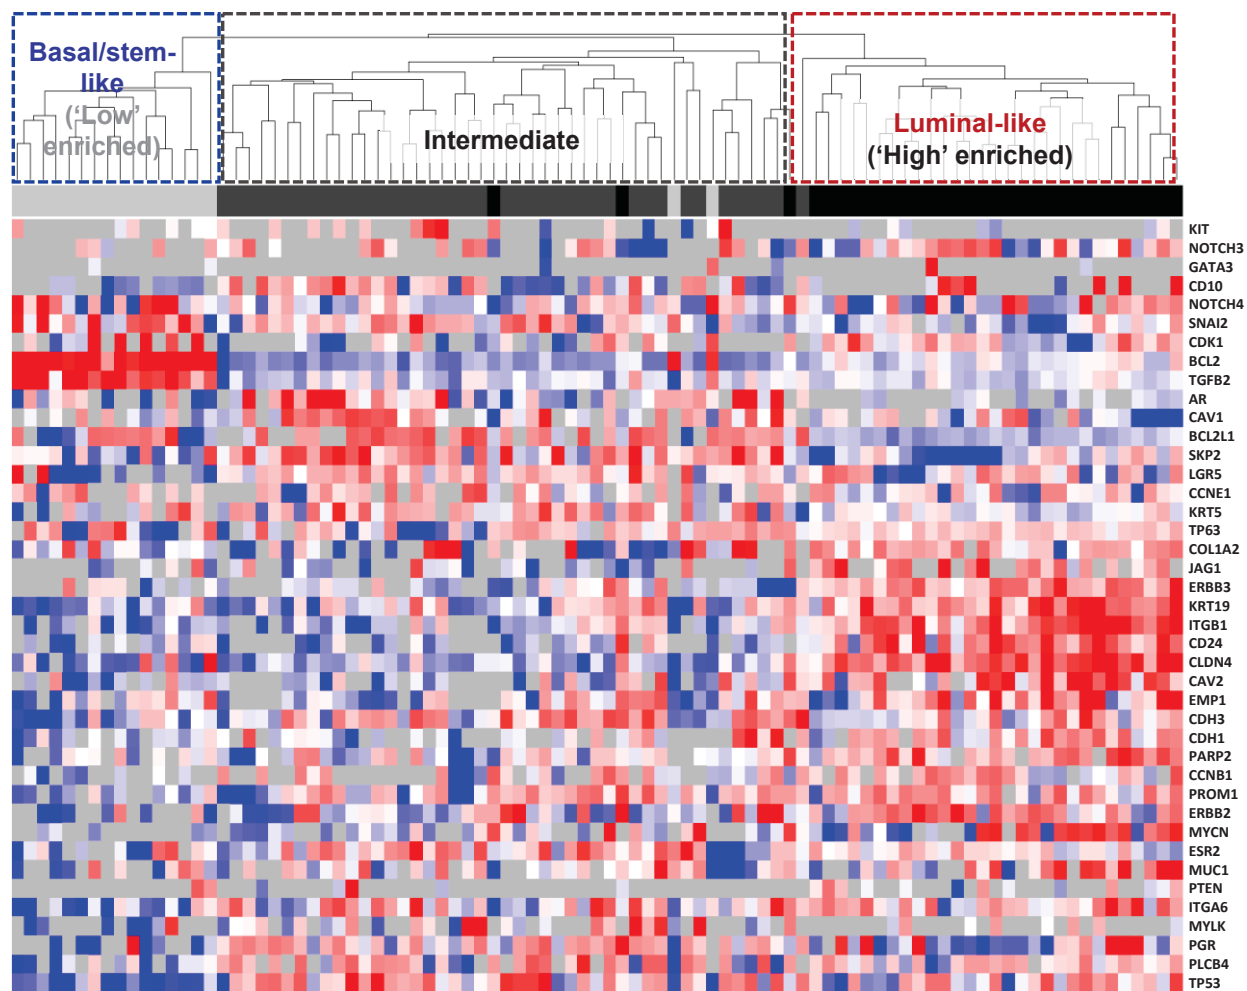

HCI-002

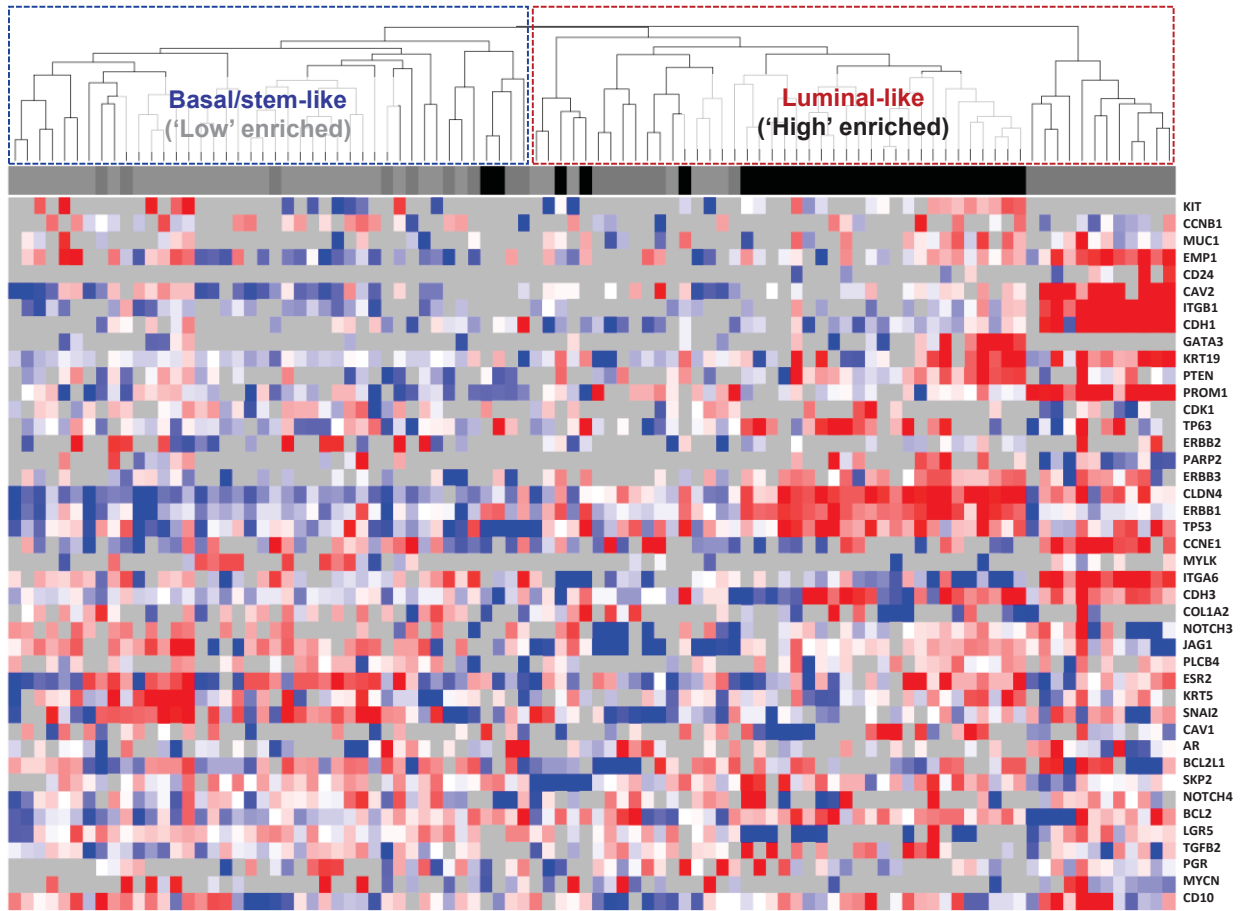

### HCI-010

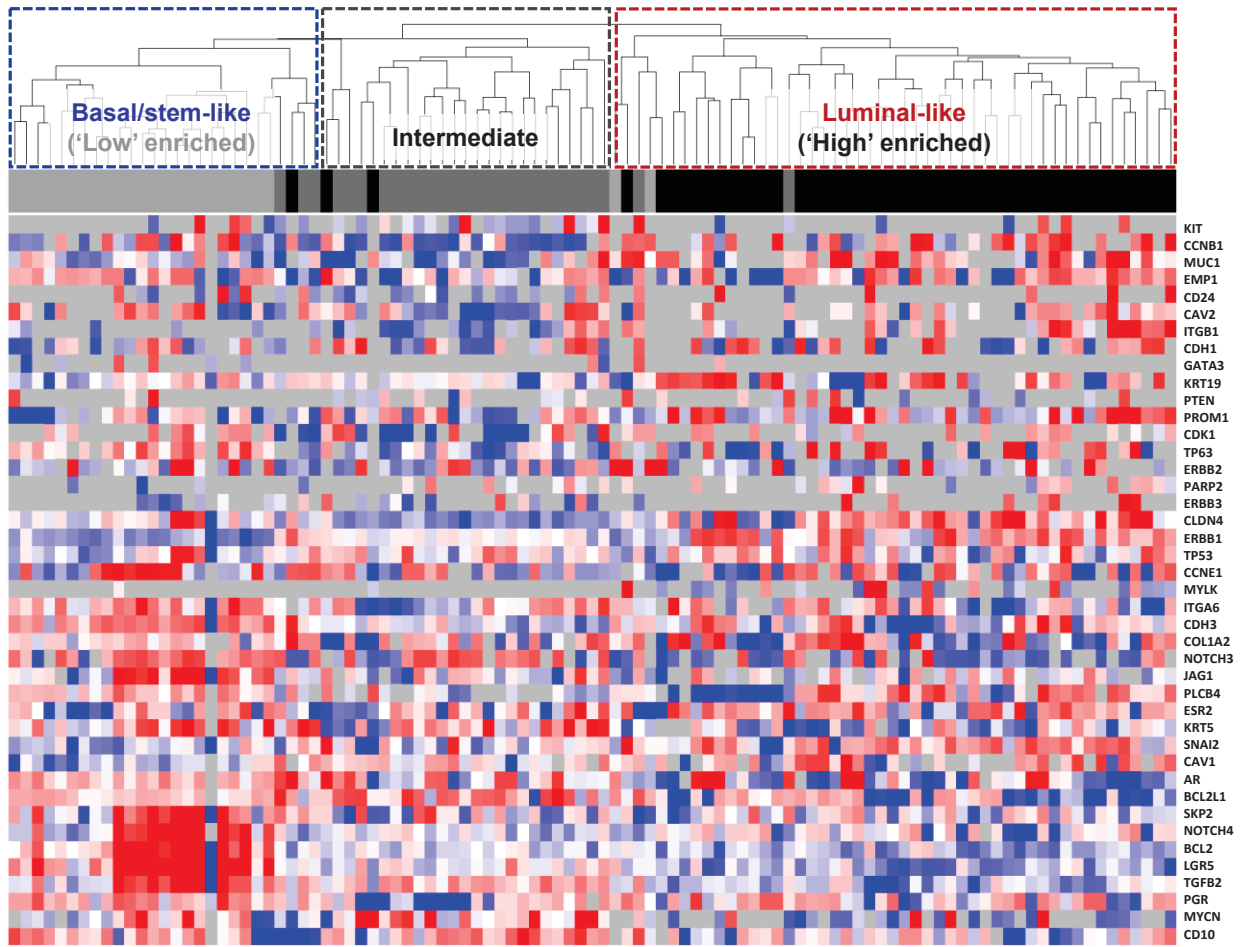

HCI-010 + #453 (Resected animal)

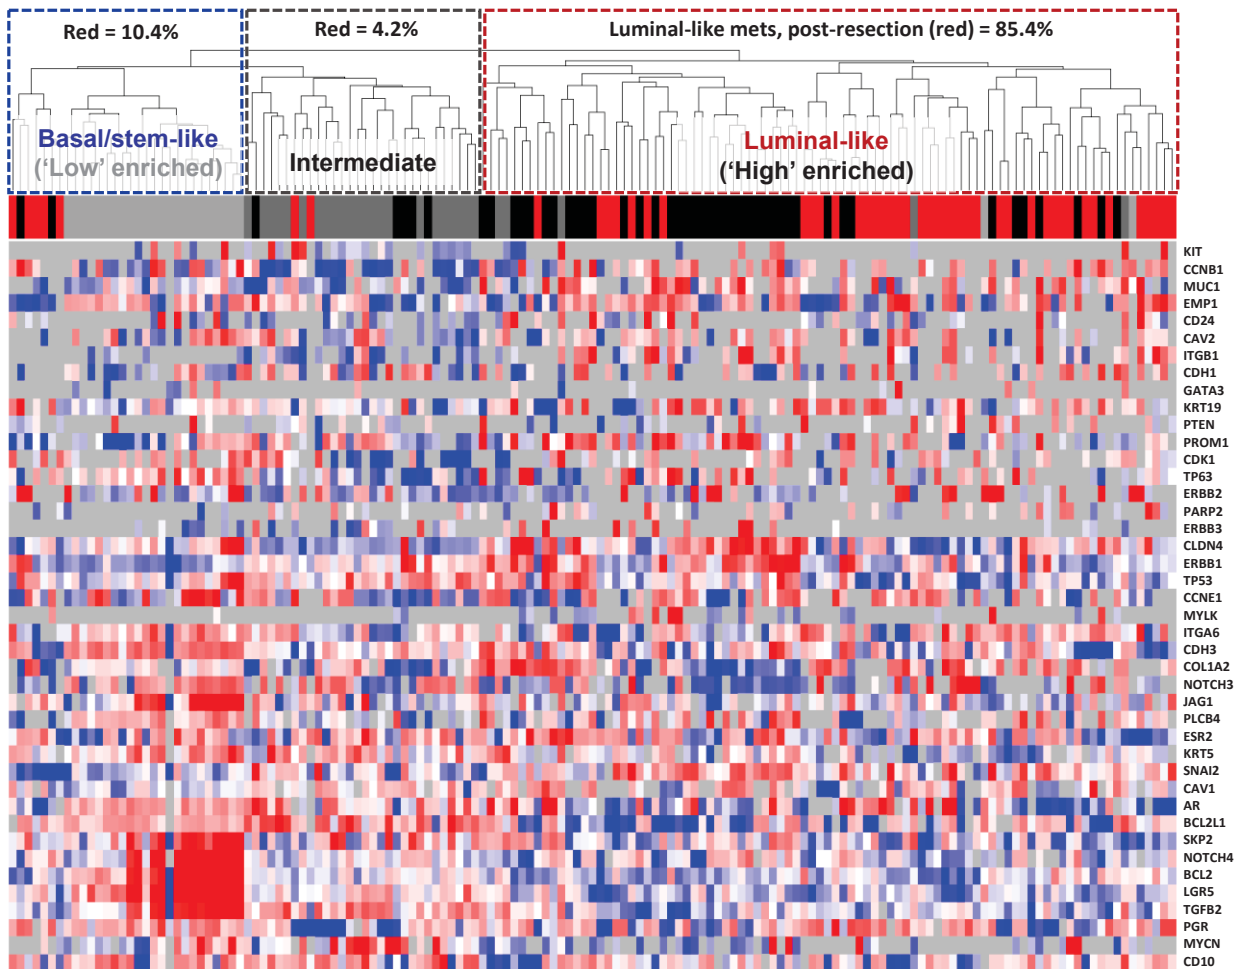

Clustering by PDX model

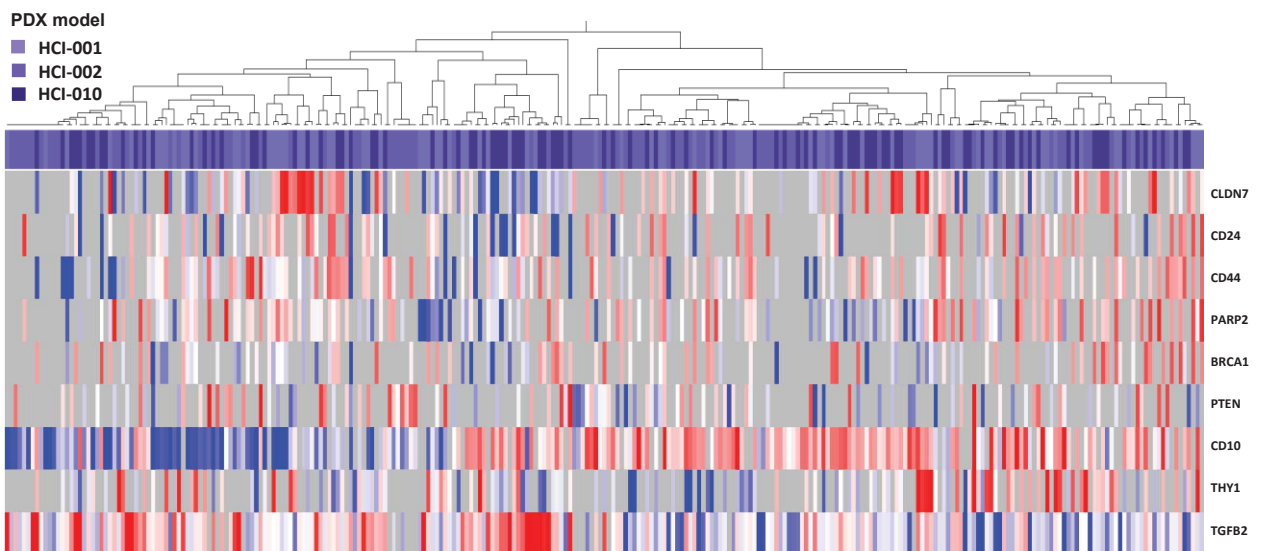

Supplementary Data 2: Full heatmaps showing unsupervised hierarchical clustering analyses shown in Extended Data Fig. 4

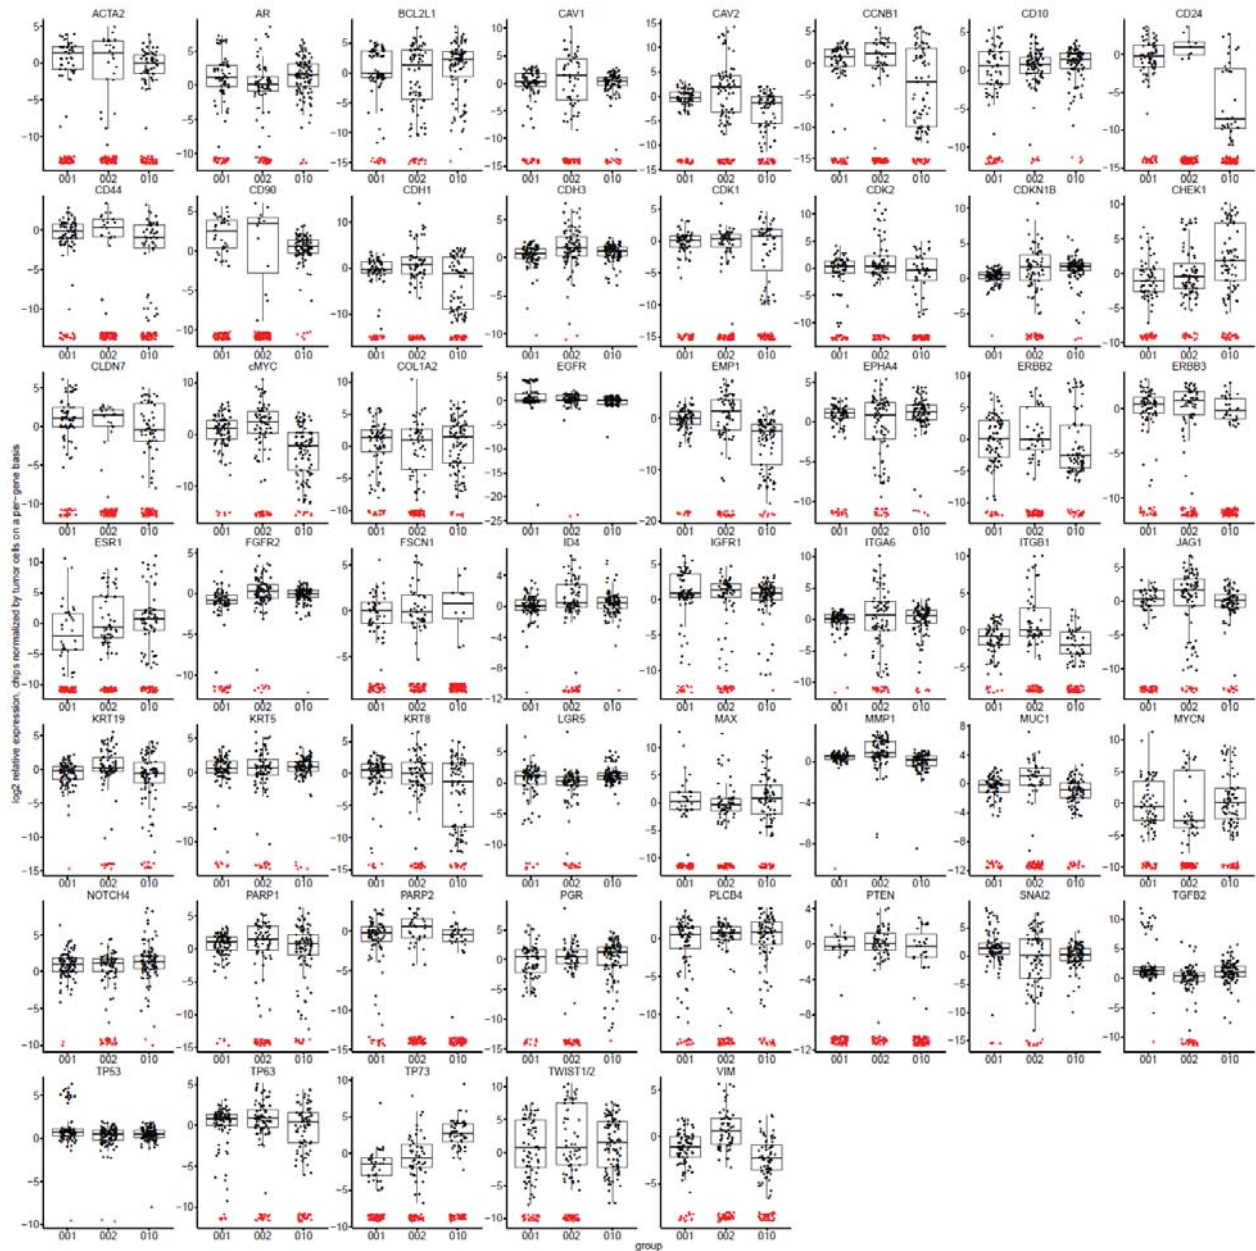

**Supplementary Data 3: Gene expression in individual lung metastatic cells from each of the three PDX models (HCI-001, HCI-002, and HCI-010).** Box plots show expression levels for each of the 53 genes differentially expressed between the models by Anova. Black dots, single cells; red dots, single cells with no expression.



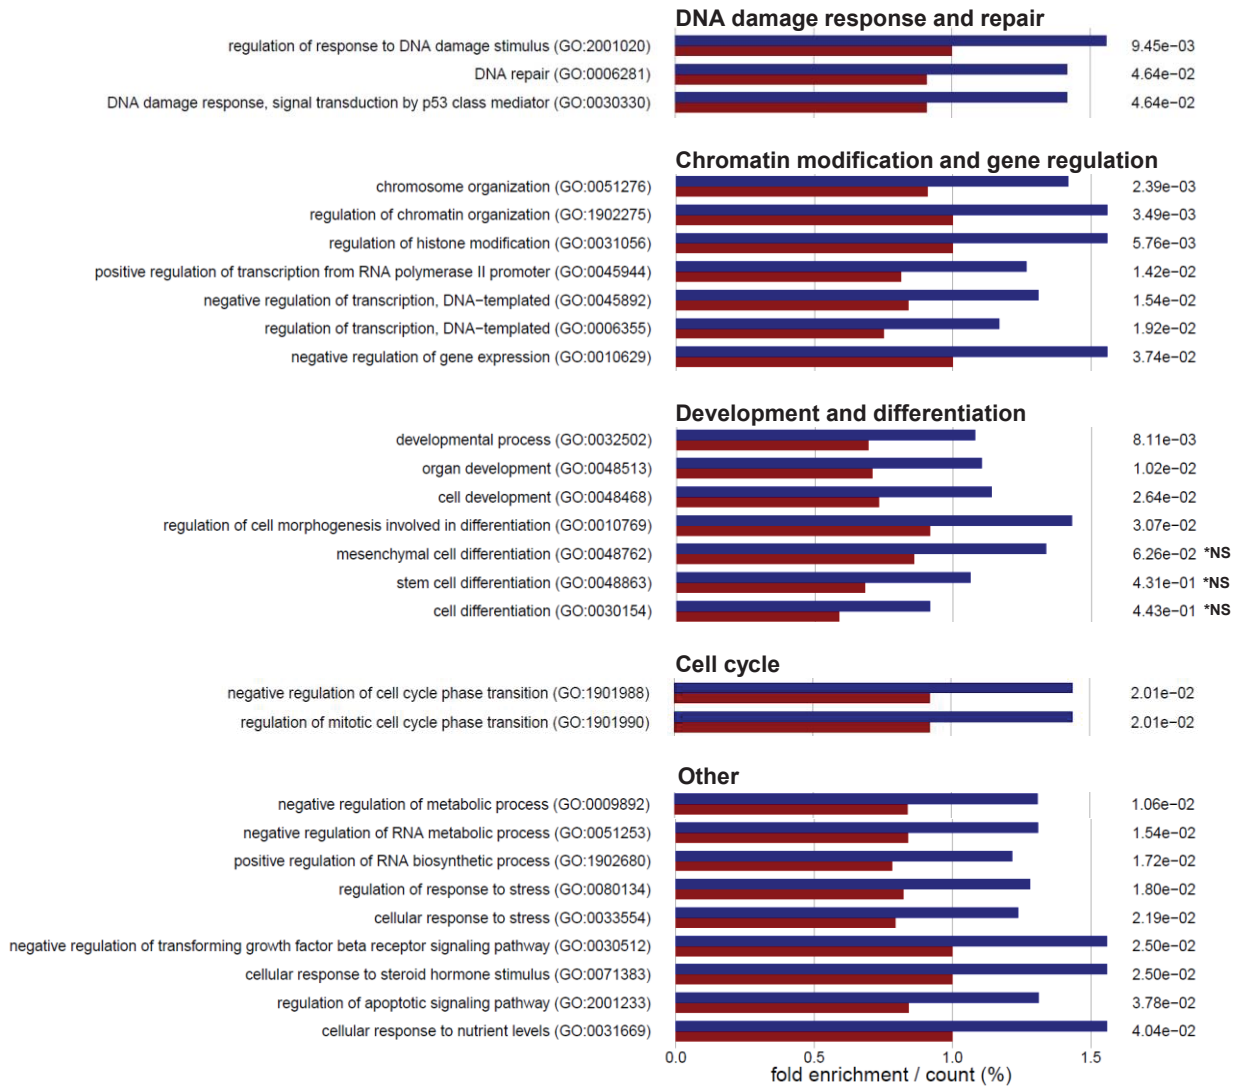

**Supplementary Data 4: Gene ontology (GO) enrichment analysis reveals several biological processes are differentially regulated in low-burden metastatic cells.** GO enrichment analysis was performed to identify pathways that were more represented in the set of significantly differentially expressed genes than would be expected by chance alone. Pathways involving DNA damage response and repair, chromatin modification and gene regulation, development and differentiation, and cell cycle were identified. p-values are shown at the right of each bar. \*NS, not significant.

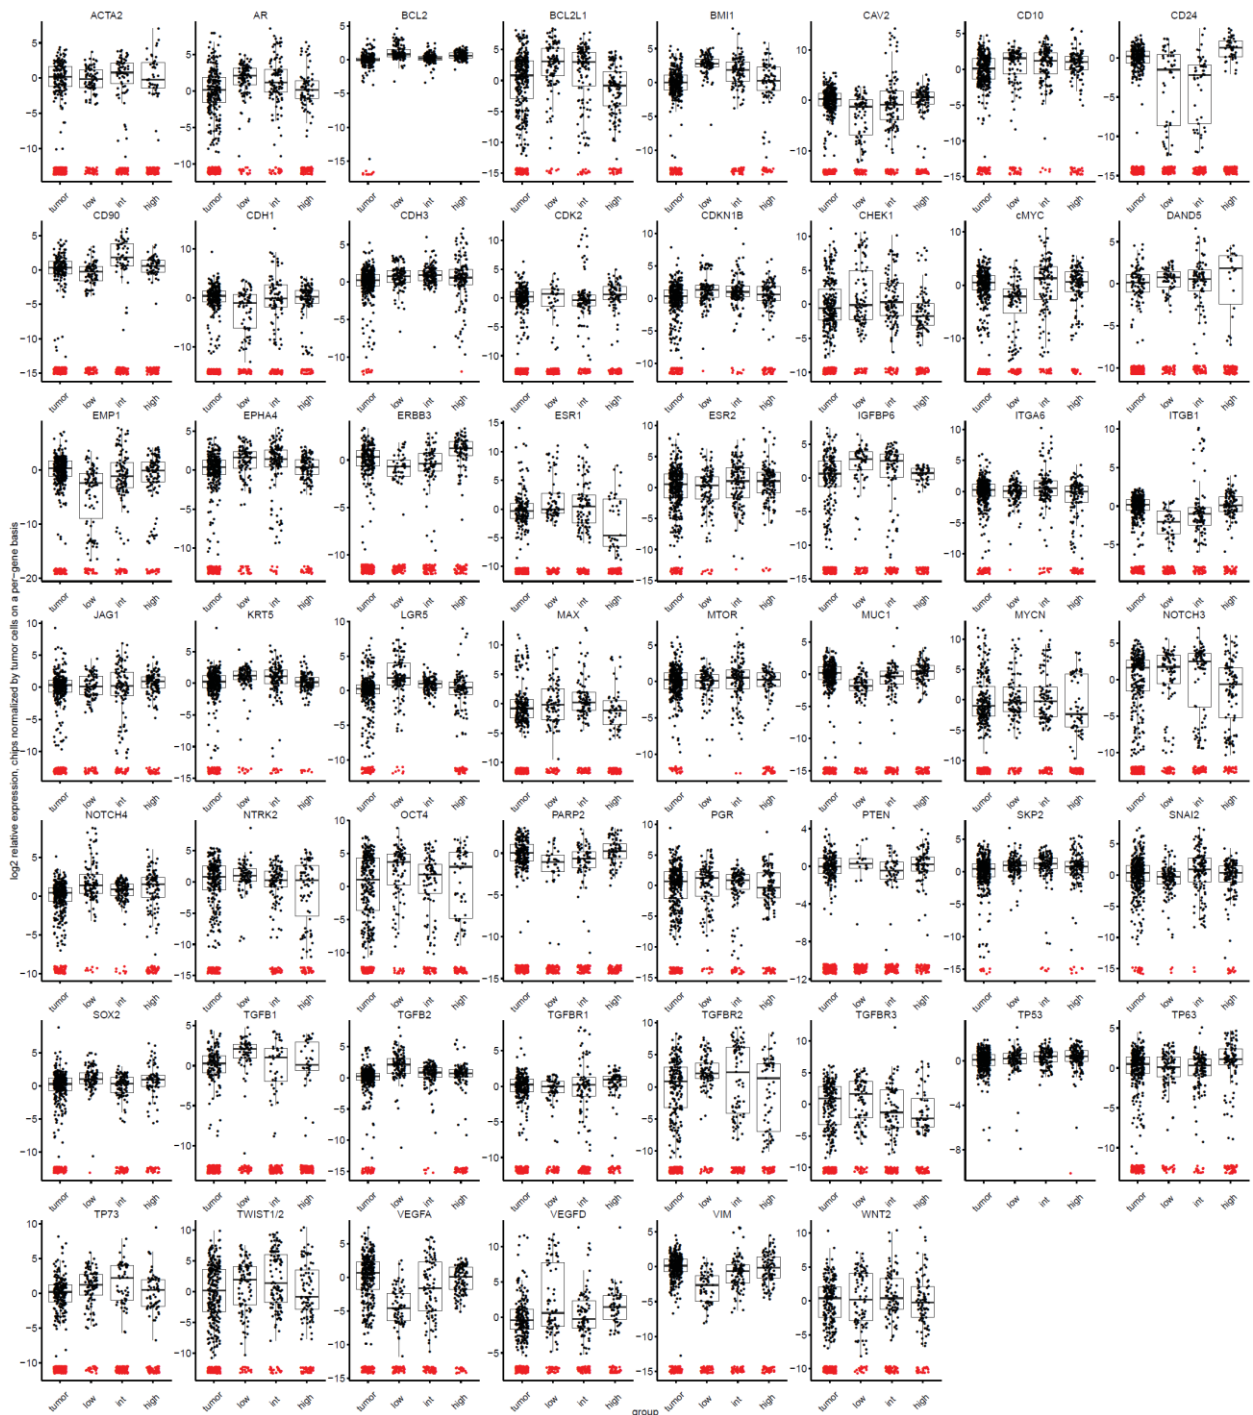

**Supplementary Data 5: Gene expression in individual cells from tissues with low, intermediate, or high metastatic burden.** Box plots show expression levels for each differentially expressed gene ( $p < 0.05$ ) in individual cells. P-values and fold change for each gene are shown in **Extended Data Table 2**. Black dots, single cells; red dots, single cells with no expression.

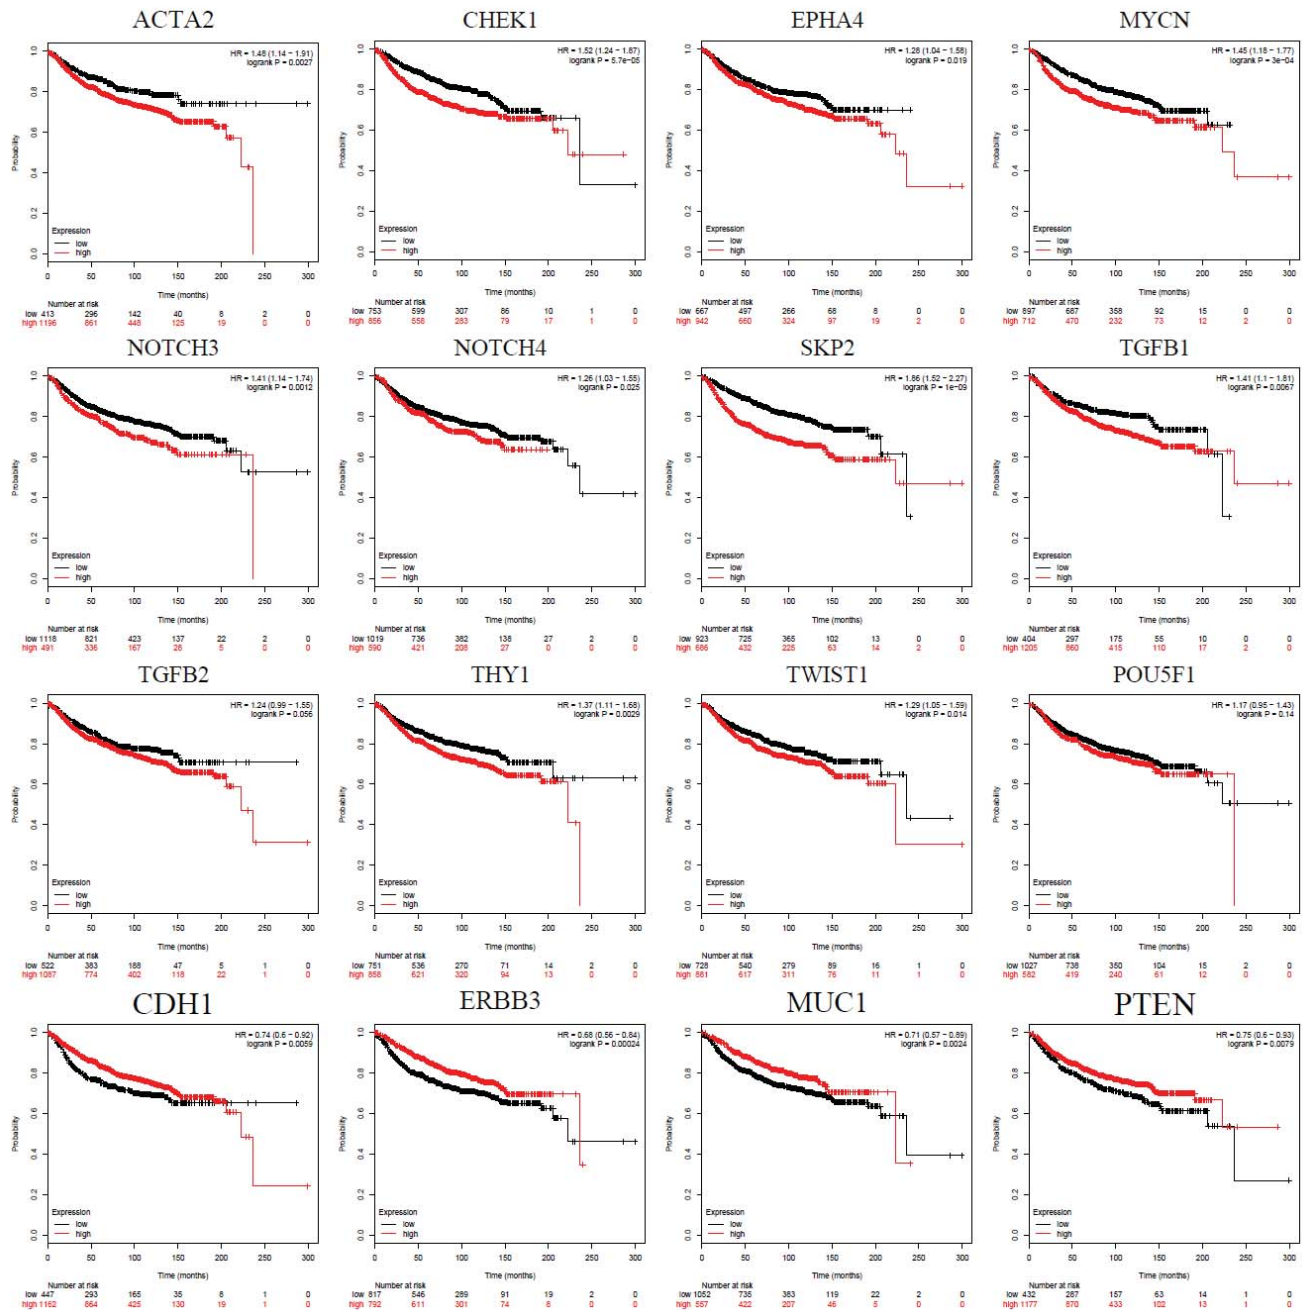

**Supplementary Data 6: Kaplan-Meier analysis shows the prognostic relevance of 16 genes characteristic of low-burden metastatic cells.** The prognostic value of each of the 55 genes characteristic of low-burden metastatic cells (**Extended Data Table 2**) was determined by Kaplan-Meier analysis using Km-plotter online software.<sup>29</sup> Km plots are shown as probability of distant metastasis-free survival (DMFS). 16 of 55 genes were found to be prognostic: High *ACTA2*, *CHEK1*, *EPHA4*, *MYCN*, *NOTCH3*, *NOTCH4*, *SKP2*, *TGFB1*, *TGFB2*, *THY1* and *TWIST1* expression was associated with increased risk of distant metastasis, and increased *CDH1*, *ERBB3*, *MUC1* and *PTEN* expression was associated with reduced risk of metastasis.

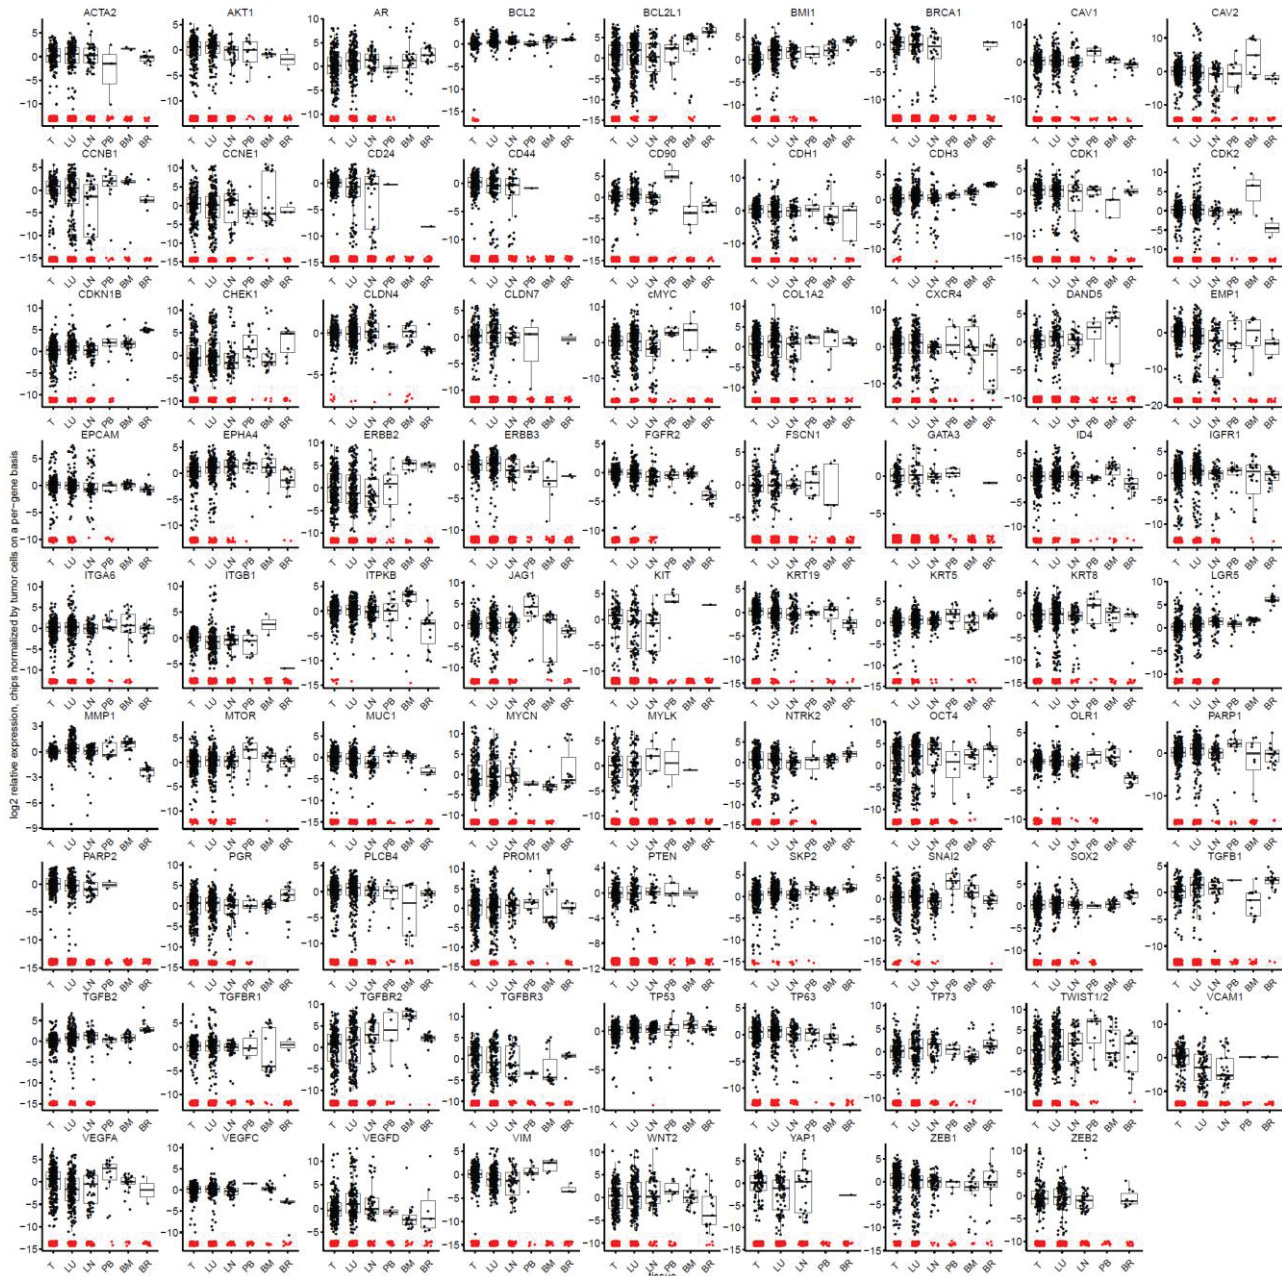

**Supplementary Data 7: Gene expression in individual primary tumor and metastatic cells from the lung, lymph node, peripheral blood, bone marrow, and brain.** Box plots show all genes (80) that were significantly differentially expressed ( $p < 0.05$ , ANOVA) between at least one pair of tissues. The p-value and fold change for each gene and tissue pair and are shown in **Supplementary Table 3**. Each black dot represents expression in a single cell, and red dots represent non-expressing cells. LU, lung; LN, lymph node; BM, bone marrow; PB, peripheral blood (CTC); BR, brain.

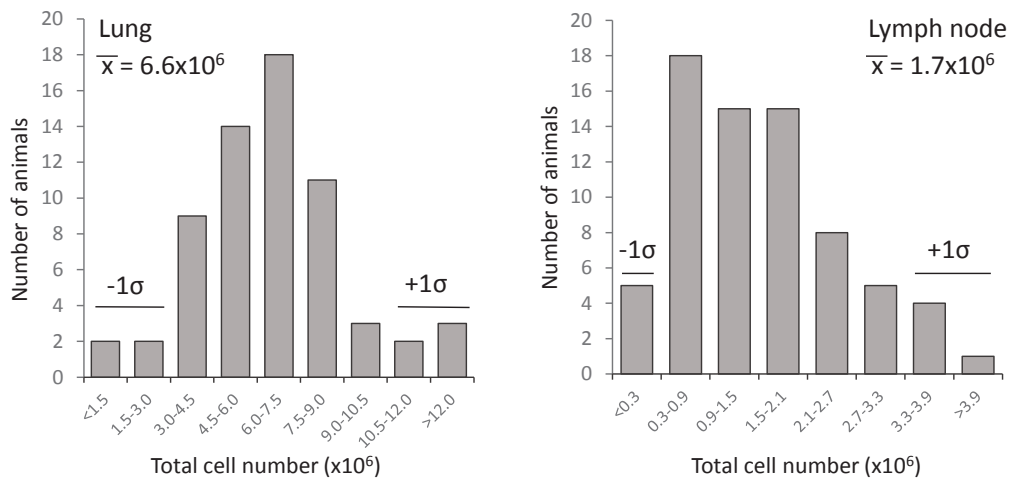

**Supplementary Data 8: Histogram plots show the distribution of cells yielded following tissue dissociation of lungs and lymph nodes from PDX animals. For consistency, any tissue digests which yielded an abnormal number of cells (>1 standard deviation from the mean) was excluded from the study. This allowed for comparison of the number of metastatic cells in different animals with reasonable consistency.**

| NCBI Gene Symbol | Description                                                              | GenBank Accession | Rationale/Function                         | Forward                  | Reverse                |
|------------------|--------------------------------------------------------------------------|-------------------|--------------------------------------------|--------------------------|------------------------|
| ACTA2            | actin, alpha 2, smooth muscle                                            | NM_001613         | Basal/Myoep/Stem                           | GTGTTGCCCTGAAGACAT       | GCTGGGACTTAAGATCTCA    |
| AKT1             | v-akt murine thymoma viral oncogene homolog 1                            | NM_001014431      | TNBRCA                                     | AGCGACTGGCTATTGTGAAG     | GCCATCACTTCTGAGGAGGAAT |
| AR               | androgen receptor                                                        | NM_000044         | TNBRCA                                     | GACGACAGATGGCTGCTATT     | GGCCGAAGTAGAGGATCC     |
| ASPSCR1          | alveolar soft part sarcoma chromosome region, candidate 1                | NM_001251888      | Luminal                                    | GAGGTGCTGCACCTTTCTC      | AGCGATGGAACCATCTTCTC   |
| BCL2             | B-cell CLL/lymphoma 2                                                    | NM_000657         | Anti-apoptosis                             | GGTGGGTCTGTGTGTGG        | CGTTCAGCTCAATGATCTC    |
| BCL2L1           | BCL2-like 1                                                              | NM_001191         | Anti-apoptosis                             | GAGCTGGTGTGACTTTCTC      | TCATCTCGATCAGTCTCT     |
| BM11             | B lymphoma Mo-MuV insertion region                                       | NM_005180         | Stem cell                                  | CCACCTGATGTGTGCTTTG      | TTCAAGTAGTCTGTGCTTGT   |
| BRCA1            | breast cancer 1, early onset                                             | NM_007297         | TNBRCA                                     | GAAACCTGCGAAAAGACTC      | CAAAAGTGAAGAGTGGACAC   |
| BRCA2            | breast cancer 2, early onset                                             | NM_000059         | TNBRCA                                     | TGCTGAAAACAGATGACTATC    | AGGCTAGCAACTCGCTTTA    |
| CASP3            | caspase 3, apoptosis-related cysteine peptidase                          | NM_004346         | TNBRCA                                     | AGAGGGGATCGTTGAGAAGT     | ACAGTCCAGTCTGTGACAC    |
| CAV1             | caveolin 1                                                               | NM_001172895      | TNBRCA; EMT                                | CATCCGATGGCACTCATCTG     | TGACCTGAATCTCAATGAGAA  |
| CAV2             | caveolin 2                                                               | NM_001206748      | TNBRCA                                     | AAGACTGCTCAATGTTCTGCG    | TGTCACATCAATGAGCAATG   |
| CCNB1            | cyclin B1                                                                | NM_031966         | Cell cycle                                 | ATAAGGGGAAGATCAACATGG    | TTTGTATCAAGTCCCAAGAG   |
| CCND1            | cyclin D1                                                                | NM_053056         | Cell cycle                                 | GCTCGGAAGTGAACCAATC      | CCCTCTCTGCACCATTTGAA   |
| CNE1             | cyclin E1                                                                | NM_001238         | Cell cycle                                 | GCCAGCTTGGGACAATAATG     | CTTGACAGTTGAGTTGGT     |
| MME              | metallo-endopeptidase/CD10                                               | NM_000902         | Cell surface marker                        | GATCGCACTATGCAACCTAC     | TGTTTGGATCAGTGAGAGC    |
| CD24             | Heat stable antigen CD24                                                 | NM_013230         | Cell surface marker                        | CTCTACCCACGAGATTATTCT    | AGAGTAGAGACCAAGAGAGC   |
| CD44             | CD44 molecule (Indian blood group)                                       | NM_001001392      | Cell surface marker                        | CTGCGCTTTGACAGTGTG       | CATTGTGGGCAAGGTGCTATT  |
| THY1             | Thymocyte differentiation antigen 1, CD90                                | NM_006288         | Cell surface marker                        | TCACCATCCAGTACAGGTTCT    | AGGCGGATGTGTGTCTCAG    |
| CDH1             | cadherin 1, type 1                                                       | NM_004360         | Epithelial                                 | ATTTTTCCCTGCACCCGAT      | TCCCAGGGCTAGACCACCA    |
| CDH3             | cadherin 3, type 1, P-cadherin (placental)                               | NM_001793         | TNBRCA; EMT                                | ATCATCTGTGACCGACCAAT     | GACTCCCTTAGACACTCTCC   |
| CDK1             | cyclin-dependent kinase 1                                                | NM_001786         | Cell cycle                                 | GGATGTCTTATCAGAGATTCC    | CATGTACTACAGGAGGGATAG  |
| CDK2             | cyclin-dependent kinase 2                                                | NM_001798         | Cell cycle                                 | CCAGAGTACTCTCTATGCTTGA   | TTCACTCAGGGAGGTAGAAC   |
| CDKN1B           | cyclin-dependent kinase inhibitor 1B (p27, Kip1)                         | NM_004064         | Cell cycle                                 | TAATTGGGCTCCGCTCAACT     | TCAGCTGGTCTCTTATTCC    |
| CDKN2A           | cyclin-dependent kinase inhibitor 2A (p16)                               | NM_058197         | Cell cycle                                 | GTAACTATTCTGGTGGTGGG     | ATGAGCTCTGGCTGACT      |
| CHEK1            | checkpoint kinase 1                                                      | NM_001274         | Cell cycle                                 | ATATGAAAGGTGCGTAGACT     | TSCTATGTCTGGCTTACTTG   |
| CLDN1            | claudin 1                                                                | NM_021101         | Claudin; biomarker; TNBRCA                 | CTCTGCTTATTAGTGGCAGAG    | AGAGAGCTGACCAAACTGG    |
| CLDN3            | claudin 3                                                                | NM_001306         | Claudin; biomarker; TNBRCA                 | AAACCATATTCCGGGACTTCT    | CGGGAGTAGACAGCTTCTG    |
| CLDN4            | claudin 4                                                                | NM_001305         | Claudin; biomarker; TNBRCA                 | GGGGCAAGTGTACCAACTG      | GACACGGGACTACTACCA     |
| CLDN7            | claudin 7                                                                | NM_001185023      | Claudin; biomarker; TNBRCA                 | GCTGCAAAATGTACAGCTCG     | GGAGACCAACTTAGGGCTC    |
| MYC              | v-myc myelocytomatosis viral oncogene homolog (avian) (c-MYC)            | NM_002467         | Cell cycle; Proliferation; TNBRCA          | GGCTCCAAAAGGTCA          | CTGGTAGTGTGTGTGATGT    |
| COL1A2           | collagen, type I, alpha 2                                                | NM_000089         | Basal/Myoep/Stem                           | GAGCGGTAAACAAGGGTGGC     | TTCCCATTAAGGCTCTCTC    |
| CXCL12           | chemokine (C-X-C motif) ligand 12                                        | NM_001178134      | Angio/lymphangiogenesis                    | ATTCTCAACCTCAAACTGGC     | ACTTATGCTGGGTCAATGC    |
| CKCR4            | chemokine (C-X-C motif) receptor 4                                       | NM_003467         | Angio/lymphangiogenesis                    | GGCAATGGATTGTCTCATCTC    | TGACCGCTGTACTGTCCG     |
| DAND5            | DAN domain family, member 5                                              | NM_152654         | CTC                                        | AAGTATCCAGGGGATGTGTA     | GATGATCTCGAGAGCTATTG   |
| DLL1             | delta-like 1 (Drosophila)                                                | NM_005618         | Notch signalling                           | GACGAACACTACTAGGAGAGG    | AGACGGGTGACCACTTC      |
| EMP1             | epithelial membrane protein 1                                            | NM_001423         | Luminal progenitor                         | GTCTGGCTGTGACTTCTG       | CCGTTGTGATCACTGCTTC    |
| EPCAM            | epithelial cell adhesion molecule                                        | NM_002354         | Epithelial; Cell surface marker; CTC       | CTTGTCTTCTTCTGACCCG      | CTTCTGCTGCTGCTGAGAG    |
| EPHA4            | EPH receptor A4                                                          | NM_004438         | Basal/Myoep/Stem                           | CTTGGTGAAGCTCTCATCAG     | GCAAGGAGCTTTAACTCTG    |
| EGFR             | epidermal growth factor receptor (ERBB1, HER1)                           | NM_201284         | Growth factor receptor; TNBRCA             | TTGCCCAAGTGTGTAACG       | GTGACCCCAATGCAACCG     |
| ERBB2            | v-erb-b2 erythroblastic leukemia viral oncogene homolog 2                | NM_001005862      | Growth factor receptor; biomarker          | TGTGACTGCTCTCACTCAA      | CCAGCAATAGCAACTCTGC    |
| ERBB3            | v-erb-b2 erythroblastic leukemia viral oncogene homolog 3                | NM_001982         | Growth factor receptor                     | GACCCAGTCTAGATGGGAA      | TGGTACGATCACTGAGCGG    |
| ESR1             | estrogen receptor 1                                                      | NM_001122741      | Hormone receptor; biomarker                | GGGAAGTATGGTATGAACTCT    | TGGCTGACACATATGAGCTGT  |
| ESR2             | estrogen receptor 2                                                      | NM_001214902      | Hormone receptor                           | TCATCCGCACTTATCACTCT     | CTGGACCAATCAAGGGCTGT   |
| FGFR2            | fibroblast growth factor receptor 2                                      | NM_00114915       | TNBRCA                                     | AGCCCACTGGCAACCACTC      | GGCAGCAAACTTGACAGTG    |
| FOXA1            | forkhead box A1                                                          | NM_004496         | Luminal                                    | CTGCACCTGAAGGGGACCC      | CTTGTAAGTCCACTTATGCG   |
| FSCN1            | fascin homolog 1, actin-bundling protein (Strongylocentrotus purpuratus) | NM_003988         | TNBRCA; EMT                                | CCAGGGTATGACCTGTCTCG     | GTGTGGTACGGAAAGGAC     |
| GATA3            | GATA binding protein 3                                                   | NM_001002295      | Luminal                                    | GCGGGCTTATCA             | GCCTTGGCTTGGCTTAAT     |
| ID4              | inhibitor of DNA binding 4                                               | NM_001546         | TNBRCA                                     | CACGTATCCACTACTCTGCG     | TGTGGCCTGCTGTTCAC      |
| IGFBP6           | insulin-like growth factor binding protein 6                             | NM_002178         | Basal/Myoep/Stem                           | TGTGAACCCAGAGCAACAC      | CCCACTCACTGTGTGGA      |
| IGF1R            | insulin-like growth factor 1 receptor                                    | NM_000875         | TNBRCA                                     | ATGCTGACTCTTGTACTCTC     | GGCTTATCCCAATGAGTAGT   |
| ITGA6            | integrin, alpha 6                                                        | NM_001079818      | Cell surface marker                        | GGCGGTGTATGTCTGAGTC      | AATCCGCATCAAAAGCTC     |
| ITGB1            | integrin, beta 1                                                         | NM_033668         | Cell surface marker                        | GTAACCAACCTAGCAAAAGGA    | TCCCCTGATCTTAACTGAAAC  |
| ITPKB            | inositol-trisphosphate 3-kinase B                                        | NM_002221         | Luminal progenitor                         | TCTCTCACTCCAGAACTACTA    | GCCTCACTAGTCTTCTGCTG   |
| JAG1             | jagged 1                                                                 | NM_000214         | Basal/Myoep/Stem                           | GAGCTTTTGGCAACAGCC       | GGAGTTTGCAGAGACTGCG    |
| KIT              | v-kit Hardy-Zuckerman 4 feline sarcoma viral oncogene homolog            | NM_000222         | Luminal progenitor                         | GGCTTCTCTACTGCTCTG       | CCCAAGGGCACTTAAGTCT    |
| KRT14            | keratin 14                                                               | NM_000526         | Basal/Myoep/Stem                           | CCCAAGTCCGCTCGAGATCG     | GGGAGAGGAGAGGTTGGGCG   |
| KRT17            | keratin 17                                                               | NM_000422         | Basal/Myoep/Stem                           | GGTGGGTGGTGAATCAATG      | CCGGTTCAGTCTCTCTGCT    |
| KRT18            | keratin 18                                                               | NM_199187         | Luminal                                    | TGCGAAATCTGGACACTGCG     | CGAGTGTGTAGTATGGTGT    |
| KRT19            | keratin 19                                                               | NM_002276         | Luminal                                    | AACGGGAGCTAGAGGTGA       | GGATGTGCTGTAGTAGTGGC   |
| KRT5             | keratin 5                                                                | NM_000424         | Basal/Myoep/Stem                           | CCAAAGTGTGATCACTGATGG    | GTTCAGACATGCTGCTGCG    |
| KRT8             | keratin 8                                                                | NM_001256293      | Luminal                                    | TCTCAGGCACTATGAAAGAG     | GGTTGGCAATATCTGCTACT   |
| LGR5             | leucine-rich repeat containing G protein-coupled receptor 5              | NM_003667         | Basal/Myoep/Stem                           | CACTCTTACTAGACTCAGT      | CAGCAAGCACTCACTCCAG    |
| MAX              | myc-associated factor X                                                  | NM_002382         | Myc co-regulator                           | CAATCTCGGCTGCAACAACT     | GCCTTAGGCTCGTAATCTGC   |
| MKI67            | antigen identified by monoclonal antibody Ki-67                          | NM_002417         | Proliferation                              | AGAAGAGTGGTCTCGGAA       | AGTGTTCGTGCTGTACTAA    |
| MLL4             | myeloid/lymphoid or mixed-lineage leukemia 4                             | NM_014727         | Luminal progenitor                         | TTGCTTGGGACTGAATCA       | CCCTGTCAGTCAACTTCTCT   |
| MMP1             | matrix metalloproteinase 1                                               | NM_002421         | Basal/myoep/Stem; matrix metalloproteinase | AAAATACAGCCAGATTGGC      | GGTGTGACATTTCCAGAGTTG  |
| MMP10            | matrix metalloproteinase 10 (stromelysin 2)                              | NM_002425         | Matrix metalloproteinase                   | TGCTGCTATCTCTGAGT        | TGCATCTTTTGGAGTGTGAG   |
| MTOR             | mechanistic target of rapamycin                                          | NM_004958         | TNBRCA                                     | GCAGATTGGCCAACTATCTGG    | CGAGGTAAGTGTCTCCCTG    |
| MUC1             | mucin 1                                                                  | NM_001204294      | Luminal; Cell surface marker               | TGCCGCAAGAACTACTG        | TGGGTTACTGCTCTAAGAT    |
| MYCN             | v-myc myelocytomatosis viral related oncogene                            | NM_005378         | Myc co-regulator                           | TGATCTCAACGATGCTTCTC     | GGACGCTGGTCTTCTTCT     |
| MYLK             | myosin light chain kinase                                                | NM_053028         | Basal/Myoep/Stem                           | CCGAGGTGTCTGTGTTCAA      | GCAGGTACTTGTGCTGCTG    |
| NOTCH3           | notch 3                                                                  | NM_000435         | Luminal                                    | GGTGGTACTACTGACTC        | AGATAGAGTACTGACTGACT   |
| NOTCH4           | notch 4                                                                  | NM_004557         | Basal/Myoep/Stem                           | CTGGCTCTCAACTCTC         | AGAAAGTCTCCAGACAGT     |
| NTRK2            | neurotrophic tyrosine kinase, receptor, type 2                           | NM_006180         | CTC                                        | ACCAGAAACAAGTGAAGAGT     | AGCATGTAATGATGATCCCA   |
| POU5F1           | POU domain, class 5, transcription factor 1, OCT4                        | NM_002701         | Pluripotency                               | CTTGAATCCGAAATGAAAGG     | GTGTATATCCAGGTTGCTCT   |
| OLR1             | oxidized low density lipoprotein (lectin-like) receptor 1                | NM_001172632      | CTC                                        | TTGCTGGGATGATGATGACC     | GCCTTCTGTGTAGGAGTGT    |
| PARP1            | poly (ADP-ribose) polymerase 1                                           | NM_001618         | TNBRCA                                     | TGGAAAAGTCCACACTGGTA     | AAGTCCAGAGAACCATCAC    |
| PARP2            | poly (ADP-ribose) polymerase 2                                           | NM_001042618      | TNBRCA                                     | GCCTTCTGTAAAGGGCAAA      | TCTCTCAATACATGAGCC     |
| PDGFR            | platelet-derived growth factor receptor, alpha polypeptide               | NM_006206         | TNBRCA                                     | TGGCAGTACCCATGCTGAA      | CCAAAGCCAGAACAGGGC     |
| PDGFRB           | platelet-derived growth factor receptor, beta polypeptide                | NM_002609         | TNBRCA                                     | AGACCGGAGAAATCTTTTGC     | AGTCTCGGATCAATGAGG     |
| PGR              | progesterone receptor                                                    | NM_000926         | Hormone receptor; biomarker                | TATGTTGCTCTACTGTTGGG     | GCAGATTATCAAGTCAAG     |
| PIM1             | pim-1 oncogene                                                           | NM_001243186      | TNBRCA                                     | GGCTCGTCTACTCAGGCA       | GGAAATCCGGTCTCTCCAC    |
| PLCB4            | phospholipase C, beta 4                                                  | NM_001172646      | Luminal                                    | TATTCGCTGGGAGCCATAC      | GACAAAACATCCGCTCTC     |
| PROM1            | prominin 1                                                               | NM_001145848      | Luminal; Cell surface marker               | AGTGGAACTGGCAGATAGC      | GGTATGTTGACTGGGCCAAT   |
| PTEN             | phosphatase and tensin homolog                                           | NM_000314         | TNBRCA                                     | AGGGCAACTGGTGAATGA       | CTTGCTTACTTCCCAATGAA   |
| RAB11B           | RAB11B, member RAS oncogene family                                       | NM_004218         | Luminal progenitor                         | TACCACCAGGAGTCAAC        | CTGCAACAGGTAGTACGC     |
| RB1              | retinoblastoma 1                                                         | NM_000321         | Cell cycle; TNBRCA                         | TTGGATCAGCGATACAAAT      | AGCCAGCCAGTAAAGACT     |
| ROR1             | receptor tyrosine kinase-like orphan receptor 1                          | NM_001083592      | Luminal progenitor                         | TCTCGCTGGGATGAAAC        | TCAGTGGAAAGAACCACTC    |
| SKP2             | S-phase kinase-associated protein 2                                      | NM_032637         | Cell cycle                                 | ATGCCCAATCTGTCCACTCT     | CACGCACTGAGTATGAGTGT   |
| SNAI2            | snail homolog 2 (Drosophila)                                             | NM_003068         | EMT                                        | CGAATGGACACATACAGT       | CTGAGGATCTGTTGTGTT     |
| SOX2             | SRY (sex determining region Y)-box 2                                     | NM_003106         | Pluripotency                               | TACAGATGCTCTACTCGCAG     | GAGGAAGAGTAAACACAGGG   |
| SPARC            | secreted protein, acidic, cysteine-rich (osteonectin)                    | NM_003118         | Basal/Myoep/Stem; EMT                      | TGAGGTATCTGGGAGCTAATC    | CTTGGCGTCTTGTGAGT      |
| SPON1            | spondin 1 (F-spondin)                                                    | NM_006108         | Basal/Myoep/Stem                           | CCAACTGACGAGGCTACTG      | GGTTCGGGCTGTGAGAAAT    |
| TGFB1            | transforming growth factor, beta 1                                       | NM_000660         | Angio/lymphangiogenesis                    | CAATTCTGGCATCTCTCAG      | GGCAACTCCGGTGAATCAA    |
| TGFB2            | transforming growth factor, beta 2                                       | NM_001135599      | Angio/lymphangiogenesis                    | CAGCACACTGATATGGACCA     | CTCGGGCTCAGATGATCT     |
| TGFB3            | transforming growth factor, beta 3                                       | NM_003239         | Angio/lymphangiogenesis                    | CACCAAGAAACACCGAGTCT     | GGGGAACCTTGGAGGTAT     |
| TGFB1R1          | transforming growth factor, beta receptor I                              | NM_001130916      | Angio/lymphangiogenesis                    | GCTTGTGTCGACTTGGACTG     | TTTTTGTGCTGCTGTTGGT    |
| TGFB2R2          | transforming growth factor, beta receptor II                             | NM_003242         | Angio/lymphangiogenesis                    | GTAGCTCTGATGAGTCAATGAC   | CAGATAGGCACTCCCACTG    |
| TGFB3R3          | transforming growth factor, beta receptor III                            | NM_001195684      | Angio/lymphangiogenesis                    | GTCTTCTCCAAAGTGAAC       | AGCTCGATGATGTACTCTCT   |
| THBS1            | thrombospondin 1                                                         | NM_003246         | TNBRCA                                     | TGCTATCAACCAACCGGATTCAGT | CGAGGACACTTCTTGCAGTG   |
| TNFRSF14         | tumor necrosis factor receptor superfamily, member 14                    | NM_003820         | Luminal progenitor                         | ATACAAGAGGAAAGTCTCACG    | CTGAGTCTCCATACAGCGC    |
| TNFK1            | tyrosine kinase, non-receptor, 1                                         | NM_001251902      | Luminal progenitor                         | CACTCGCCAGAGCACTC        | TTTTTCAAGCTCGGACATG    |
| TP53             | tumor protein p53                                                        | NM_001126118      | TNBRCA; Anti-apoptosis                     | TAAACAGTCTCTGAGGGCGG     | AGGACAGGCAAAACAGCCAC   |
| TP63             | tumor protein p63                                                        | NM_001114978      | Basal/Myoep/Stem                           | CTATTTGATTGAGTGAAGGGG    | CTGGGGTGGCTCATAGGCT    |
| TP73             | tumor protein p73                                                        | NM_001204187      | TNBRCA                                     | CGGGCATCGCTGTTTACA       | TGCTCTGTTGAAGTCCCTC    |
| TWIST1           | Twist homolog of Drosophila                                              | NM_000474         | EMT                                        | CTCCGAGTCTACGAGGAG       | GCTTAGGGTCTGATCTGCT    |
| VCAM1            | vascular cell adhesion molecule 1                                        | NM_001199834      | CTC                                        | GGGAAGATGCTGTGATCTCT     | TGAGGGTGGTCTCGAATTT    |
| VEGFA            | vascular endothelial growth factor A                                     | NM_001171627      | Angio/lymphangiogenesis                    | CCGCAATCTGCTG            | CCAGGGGCTGGAGTTGAT     |
| VEGFC            | vascular endothelial growth factor C                                     | NM_005429         | Angio/lymphangiogenesis                    | AGGCTGGCAACAACAAGAGA     | TCCCACACTATACCACTCT    |
| FIGF             | V-los induced growth factor (vascular endothelial growth factor D)       | NM_004469         | Angio/lymphangiogenesis                    | AGGGCTGCACTGACTTTTGG     | TCCCATCGCTCAGTGGTGT    |
| VIM              | vimentin                                                                 | NM_003380         | EMT                                        | AGTCCAGTACCCGGAGAC       | CATTCACGACTCCGGCTCT    |
| WNT2             | wingless-type MMTV integration site family member 2                      | NM_003391         | CTC                                        | GCCTTGTATTGCCATCTCTC     | CTTCCGCTTCCCATCTCTC    |
| YAP1             | Yes-associated protein 1                                                 | NM_006106         | CTC                                        | TACCGCTGGTACCGAGTTA      | TCATGCTTAGCTCACTGTGT   |
| ZEB1             | zinc finger E-box binding homeobox 1                                     | NM_001174094      | EMT                                        | TTACACTTTCATACAGAACCC    | TTTTCAGATTAACCAAGCTG   |
| ZEB2             | zinc finger E-box binding homeobox 2                                     | NM_001171653      | EMT                                        | AACAAGGATCTCAACAGCTC     | TGGCTTCTCCAGTTTCTT     |

| Basal/Stem |                       |                       |
|------------|-----------------------|-----------------------|
| Gene       | Fold change (B(L+LP)) | P value               |
| CAV2       | 89.7                  | 9.3x10 <sup>-14</sup> |
| MYLK       | 74.1                  | 6.2x10 <sup>-13</sup> |
| PDGFRA     | 55.2                  | 3.2x10 <sup>-13</sup> |
| KRT5       | 29.3                  | 2.9x10 <sup>-11</sup> |
| CAV1       | 21.3                  | 9.1x10 <sup>-9</sup>  |
| JAG1       | 18.3                  | 1.6x10 <sup>-9</sup>  |
| COL1A2     | 13.2                  | 3.2x10 <sup>-8</sup>  |
| FLCS4      | 10.7                  | 2.0x10 <sup>-8</sup>  |
| MTOR       | 7.4                   | 0.002                 |
| NOTCH3     | 6.4                   | 0.001                 |
| BCL2L1     | 6.4                   | 2.5x10 <sup>-4</sup>  |
| ACTA2      | 6.2                   | 0.001                 |
| LGR5       | 5.5                   | 5.2x10 <sup>-8</sup>  |
| MYCN       | 5.2                   | 0.004                 |
| CCNB1      | 4.9                   | 0.023                 |
| NOTCH4     | 4.2                   | 5.7x10 <sup>-5</sup>  |
| CDK1       | 4.2                   | 0.023                 |
| PGR        | 4.2                   | 0.009                 |
| CCNE1      | 3.9                   | 0.047                 |
| EGFR       | 3.5                   | 0.002                 |
| TP63       | 3.0                   | 0.002                 |
| SNAI2      | 2.9                   | 0.003                 |
| CDH3       | 2.8                   | 2.6x10 <sup>-4</sup>  |
| ITGA6      | 2.6                   | 0.009                 |
| CHEK1      | 2.5                   | 0.045                 |
| ESR2       | 2.2                   | 0.006                 |
| MME        | 2.1                   | 0.039                 |
| TGFB2      | 2.0                   | 0.039                 |
| SKP2       | 2.0                   | 0.023                 |
| BM1        | 1.6                   | 0.054                 |
| CLDN4      | 1.5                   | 0.055                 |
| ITGB1      | 1.4                   | 0.038                 |
| BCL2       | 1.4                   | 2.5x10 <sup>-4</sup>  |
| TP53       | 1.3                   | 1.8x10 <sup>-4</sup>  |

| Luminal |                   |                       |
|---------|-------------------|-----------------------|
| Gene    | Fold change (L/B) | p-value               |
| FOXA1   | 88.7              | 8.4x10 <sup>-13</sup> |
| CDH1    | 47.5              | 5.4x10 <sup>-8</sup>  |
| EMP1    | 45.9              | 1.0x10 <sup>-13</sup> |
| ERBB3   | 44.3              | 6.0x10 <sup>-9</sup>  |
| MUC1    | 13.0              | 2.4x10 <sup>-10</sup> |
| CD24    | 9.2               | 2.8x10 <sup>-5</sup>  |
| ERBB2   | 8.3               | 4.7x10 <sup>-4</sup>  |
| PTEN    | 4.5               | 9.9x10 <sup>-5</sup>  |
| AR      | 3.7               | 0.001                 |
| KRT19   | 3.6               | 0.018                 |
| GATA3   | 2.4               | 4.7x10 <sup>-4</sup>  |

| Luminal progenitor |                    |                       |
|--------------------|--------------------|-----------------------|
| Gene               | Fold change (L/PL) | p-value               |
| KIT                | 108.6              | 1.7x10 <sup>-11</sup> |
| PROM1              | 36.9               | 2.2x10 <sup>-10</sup> |
| CXCR4              | 11.7               | 0.002                 |
| PARP2              | 2.3                | 0.057                 |
